# Supplementary material for: Matrix-associated extracellular vesicles modulate smooth muscle cell adhesion and directionality by presenting collagen VI
Source: bioRxiv preprint, doi:10.1101/2023.08.17.551257, version 3 (2025-07-10)
Supplement: Table S2 [file 551257_file08.xlsx]

## Sheet: All Proteins
	logFC	AveExpr	t	P.Value	adj.P.Val	B
P27169	2.23617	13.8189	9.87048	6.14643e-11	7.36342e-08	14.9067		4.71145
P04217	1.28025	14.0184	7.83787	9.50352e-09	4.73767e-06	10.0938		2.42881
P05164	1.13037	12.2624	7.75308	1.1864e-08	4.73767e-06	9.88547		2.18915
P14780	1.36731	12.2533	7.46052	2.56792e-08	6.35993e-06	9.13811		2.57989
P02763	1.24195	17.749	7.39003	3.09775e-08	6.35993e-06	8.971		2.36519
P01019	1.41245	14.1056	7.37958	3.18527e-08	6.35993e-06	8.94495		2.66189
Q9NZN4	-0.801642	15.5793	-6.24448	7.03273e-07	0.00012036	5.97107		0.573696
P04114	1.50505	16.7343	6.11697	1.00298e-06	0.000124446	5.60719		2.83835
P29536	-1.60903	11.2207	-6.08233	1.10474e-06	0.000124446	5.51684		0.327818
P02760	0.803107	15.0457	6.06624	1.15547e-06	0.000124446	5.49036		1.74485
P02774	1.16374	14.4993	6.05779	1.18306e-06	0.000124446	5.45598		2.24037
P05155	0.804768	14.3305	6.03908	1.24654e-06	0.000124446	5.40361		1.74687
P49908	1.37468	12.1883	5.91561	1.76087e-06	0.000162271	5.06483		2.59311
Q9NZC2	1.60744	9.91073	5.87007	2.00058e-06	0.000171193	4.93587		3.04711
P35858	1.37857	14.0536	5.73606	2.91452e-06	0.000222426	4.57448		2.60011
P22792	1.22299	11.18	5.72928	2.97064e-06	0.000222426	4.56156		2.3343
Q92599	-0.761978	12.5379	-5.24074	1.17798e-05	0.000805372	3.22876		0.589687
P05156	0.867468	12.7683	5.21433	1.26924e-05	0.000805372	3.17745		1.82446
Q9ULV4	-0.810377	12.7693	-5.21209	1.2773e-05	0.000805372	3.13762		0.570233
O00391	0.621615	12.5925	5.18391	1.38317e-05	0.000810096	3.10023		1.5386
P04792	-0.934605	15.711	-5.1746	1.42003e-05	0.000810096	3.06017		0.523186
P00747	1.07578	15.1362	5.14654	1.53719e-05	0.00083707	2.97681		2.10787
P08697	1.32388	13.0354	5.07952	1.85769e-05	0.000967614	2.78105		2.50338
P30101	-0.649821	15.2636	-5.05193	2.00826e-05	0.000987427	2.71301		0.637359
Q96FN4	-1.06382	12.0752	-5.0294	2.14021e-05	0.000987427	2.65174		0.478363
P46821	-0.786007	12.2566	-5.02894	2.143e-05	0.000987427	2.64803		0.579947
Q9ULC4	-0.598931	11.347	-4.98222	2.44528e-05	0.00108498	2.53945		0.660243
Q969G5	-1.68515	13.9001	-4.95087	2.67165e-05	0.00114308	2.44184		0.31097
P43652	1.11809	12.4389	4.92281	2.89195e-05	0.00119467	2.38742		2.1706
P07355	-1.07428	17.2024	-4.90355	3.05345e-05	0.00121934	2.28937		0.474907
P00738	1.56008	16.3422	4.86375	3.41646e-05	0.00127335	2.1984		2.9487
P31689	-1.0932	10.3783	-4.85704	3.4817e-05	0.00127335	2.1736		0.46872
P01031	1.11057	14.6261	4.85442	3.50757e-05	0.00127335	2.16068		2.15931
P00739	1.44261	13.3134	4.82345	3.82774e-05	0.00134872	2.08957		2.71812
P22897	0.622312	12.1017	4.75852	4.59653e-05	0.00152498	1.9237		1.53934
P04004	0.80897	18.803	4.75731	4.61216e-05	0.00152498	1.90796		1.75196
P01009	0.90519	17.6912	4.74987	4.70987e-05	0.00152498	1.88384		1.87279
P05090	1.36794	15.5282	4.68811	5.6046e-05	0.00172077	1.71001		2.58102
P02750	0.98098	12.6086	4.67929	5.74547e-05	0.00172077	1.70258		1.97381
Q9BSL1	0.684833	10.8779	4.68146	5.71037e-05	0.00172077	1.69265		1.60752
Q96CW1	-1.1567	11.7837	-4.66983	5.90039e-05	0.00172406	1.67845		0.448538
P24158	1.16816	10.6032	4.65973	6.07049e-05	0.00173154	1.63704		2.24725
P08238;P14625	-0.649668	14.0567	-4.59633	7.25488e-05	0.00202124	1.49051		0.637427
Q9P0V9	-0.765888	10.2924	-4.58683	7.4511e-05	0.00202873	1.45534		0.588091
P07093	1.1657	13.0069	4.52528	8.85619e-05	0.00235772	1.27614		2.24343
Q6NZI2	-1.51968	14.1242	-4.50892	9.27187e-05	0.00241472	1.24505		0.348763
P01042	1.21976	13.761	4.48168	0.000100074	0.00255081	1.16109		2.32907
P06312	0.944429	13.068	4.44542	0.000110769	0.00271331	1.08733		1.92443
P24844	-1.00052	15.2681	-4.44474	0.000110978	0.00271331	1.06841		0.49982
Q99715	-0.939871	14.0781	-4.43357	0.000114504	0.00274351	1.05299		0.52128
A0A075B6J9	1.00001	12.0211	4.41977	0.000119008	0.00279553	1.01505		2.00001
P02790	0.838439	16.7669	4.40209	0.000125039	0.00288071	0.951822		1.78811
P07900;P08238;Q14568;Q58FF8	-0.705767	14.6808	-4.38239	0.000132116	0.00293921	0.940261		0.613117
Q7KZF4	-0.605401	12.5496	-4.38139	0.000132485	0.00293921	0.894085		0.657289
P04278	1.41934	12.3739	4.32477	0.000155164	0.00337975	0.743702		2.67464
P05455	-0.419585	12.3816	-4.301	0.00016579	0.00354672	0.687816		0.74764
P02765	1.43122	16.603	4.26334	0.000184116	0.00386966	0.570006		2.69675
Q9P2T1	-0.631826	11.7747	-4.24739	0.000192468	0.00397545	0.545966		0.645359
P26038	-0.777011	14.495	-4.22013	0.000207611	0.00421557	0.457592		0.583574
Q86VB7	0.804561	12.8789	4.20432	0.000216928	0.0042965	0.440397		1.74661
P05204	-0.805132	10.9036	-4.20127	0.00021877	0.0042965	0.431422		0.57231
P11766	-0.466685	13.1485	-4.18103	0.000231407	0.0044414	0.369652		0.723625
P01859;P01861	1.68734	15.0057	4.17768	0.000233563	0.0044414	0.352514		3.22062
Q6ZTR5	-0.521138	15.8656	-4.16198	0.000243953	0.00456649	0.345433		0.696822
P26006	-0.576195	12.8607	-4.13212	0.000264979	0.00488079	0.252952		0.670731
P09429	-1.1153	12.6984	-4.12682	0.000268892	0.00488079	0.206757		0.461594
P02748	1.05316	13.698	4.10625	0.000284631	0.00508937	0.146199		2.07506
P05362	0.597175	10.8012	4.08922	0.000298336	0.00525598	0.127522		1.51275
P08238;Q58FF8	-0.480965	12.9835	-4.04618	0.000335944	0.00558551	0.0580042		0.716498
P00734	0.927791	15.0283	4.06693	0.000317263	0.00545554	0.0520132		1.90236
P27695	-0.629668	12.3302	-4.06521	0.000318771	0.00545554	0.0471673		0.646325
P08133	-0.613667	16.0961	-4.04676	0.000335411	0.00558551	-0.000677534		0.653534
A0A0B4J1X8;P01766;P01780	1.04509	12.8869	4.04145	0.000340352	0.00558551	-0.0222408		2.06349
P19652	0.838981	12.8005	4.02317	0.000357926	0.00579454	-0.0575593		1.78879
A5A3E0;P0CG38;P68133	-0.78166	17.9028	-4.01381	0.00036726	0.00580415	-0.0689577		0.581697
P03952	0.910214	13.0997	4.0124	0.000368685	0.00580415	-0.0898214		1.87932
P15104	1.21746	12.7853	4.00812	0.000373055	0.00580415	-0.113474		2.32537
Q96AC1	-1.15683	14.1345	-3.99196	0.00039	0.00599001	-0.159225		0.448497
P30626	-0.925867	13.7576	-3.96839	0.000416074	0.00623071	-0.182236		0.526364
P06702	1.03705	14.9117	3.97223	0.000411711	0.00623071	-0.197814		2.05203
P25311	0.872678	14.4926	3.94057	0.000449059	0.00664164	-0.273514		1.83106
Q9UK55	1.48778	12.3503	3.91008	0.000488157	0.00713185	-0.37339		2.80457
P00450	0.68792	15.8285	3.89108	0.000514182	0.00719399	-0.377964		1.61096
P02766	1.01435	15.5894	3.89787	0.000504725	0.00719399	-0.393285		2.01999
P15311;P26038;P35241	-1.03795	16.5693	-3.89685	0.000506132	0.00719399	-0.399864		0.487019
P26641	-0.591206	13.8372	-3.88948	0.00051643	0.00719399	-0.412714		0.663788
P00738;P00739	1.28535	17.5597	3.85214	0.000571836	0.00787424	-0.511796		2.43741
P15170	-0.704283	10.6493	-3.83654	0.00059666	0.00812272	-0.541578		0.613748
A0A075B6K5;P80748	1.06653	14.6883	3.8213	0.000621929	0.00832625	-0.574898		2.09438
P09211	-0.515367	15.6011	-3.81693	0.000629375	0.00832625	-0.593961		0.699615
P05160	0.971188	11.6943	3.81513	0.000632461	0.00832625	-0.616072		1.96045
P01011	0.835652	15.8181	3.80383	0.000652184	0.00849256	-0.632364		1.78466
P02786	0.731393	11.7118	3.79313	0.000671422	0.00864907	-0.65564		1.66024
P02794	0.848185	11.8104	3.77804	0.000699485	0.00882088	-0.692241		1.80024
P27816	-0.478843	13.8955	-3.78105	0.000693809	0.00882088	-0.692718		0.717553
P04350	-0.641755	14.0501	-3.76414	0.000726359	0.00897091	-0.719839		0.640933
P29622	0.626296	13.1239	3.76819	0.000718424	0.00896534	-0.733634		1.5436
P17612;P22694	-0.633297	11.6649	-3.75727	0.000739998	0.0090461	-0.759053		0.644702
P18084	-0.612564	12.5806	-3.72811	0.000800766	0.00969008	-0.809664		0.654033
P01859;P01860	1.13685	15.7622	3.70334	0.000856172	0.0102569	-0.882037		2.199
P23284	-0.751347	11.8058	-3.6986	0.000867205	0.0102863	-0.893399		0.594049
Q96IY4	0.676778	12.8658	3.69468	0.000876427	0.0102937	-0.919777		1.59857
Q99584	-0.52272	12.6476	-3.65006	0.000988305	0.011495	-1.01945		0.696058
Q9NZP8	0.521355	12.689	3.63484	0.00102955	0.0118596	-1.05746		1.4353
Q92954	0.828566	11.8299	3.62194	0.00106583	0.0121606	-1.09139		1.77592
P11586	-0.32117	12.5842	-3.60905	0.00110331	0.012353	-1.13268		0.80042
Q96PD5	0.881875	14.2126	3.61317	0.00109117	0.0123323	-1.13392		1.84277
P04406	-0.589247	18.7322	-3.60103	0.00112727	0.0124437	-1.13958		0.66469
A0A0C4DH25;P01619	1.24133	13.1992	3.5994	0.00113219	0.0124437	-1.14881		2.36417
Q9Y5X1	-0.621028	10.8669	-3.59079	0.00115858	0.012618	-1.18195		0.650207
Q96HE7	0.558535	12.4005	3.57898	0.00119576	0.0129055	-1.18907		1.47277
O00300	0.624534	11.9129	3.55462	0.00127614	0.0136501	-1.24974		1.54171
P33176	-0.567797	11.4208	-3.53657	0.00133904	0.0141962	-1.30578		0.674646
Q9Y3I0	-0.473461	11.0613	-3.52493	0.00138122	0.0145149	-1.34375		0.720234
Q8N1G4	-0.548137	10.1754	-3.50972	0.0014382	0.0147657	-1.36965		0.683903
P14868	-0.403751	12.2025	-3.50234	0.00146671	0.0147657	-1.38545		0.75589
P46783	-1.08964	14.2623	-3.50316	0.00146351	0.0147657	-1.39263		0.469878
A0A0B4J1V0	0.915412	11.0359	3.50649	0.00145061	0.0147657	-1.39964		1.88611
Q7L1Q6	-0.634505	12.8108	-3.50402	0.00146018	0.0147657	-1.40132		0.644162
P02654	0.823761	13.8608	3.49143	0.00150981	0.0150729	-1.42947		1.77001
P01008	0.716987	15.5473	3.47595	0.00157306	0.0155746	-1.46846		1.64375
P11215	0.770781	13.0971	3.46999	0.00159809	0.0156927	-1.49428		1.70619
Q9NVA2	-0.903424	12.3491	-3.46291	0.00162832	0.0157832	-1.50122		0.534617
P31150;P50395	-0.376258	15.6761	-3.46168	0.00163366	0.0157832	-1.50393		0.770433
P46940	-0.456199	13.7053	-3.44655	0.00170033	0.016296	-1.54539		0.728904
Q92905	-0.52315	11.8948	-3.43056	0.00177369	0.0168641	-1.56031		0.695851
P04196	0.673135	14.9407	3.38489	0.00200037	0.0188697	-1.68698		1.59453
P06396	-0.42989	17.4246	-3.36073	0.00213131	0.0199477	-1.7321		0.742319
P36980	1.05074	12.2537	3.34633	0.00221323	0.0205539	-1.76202		2.07159
Q9Y6C2	0.488232	12.5955	3.32447	0.00234345	0.0214309	-1.82936		1.40273
P39060	-0.924129	15.6178	-3.32506	0.00233983	0.0214309	-1.83365		0.526998
A0A0C4DH38;A0A0J9YXX1	1.11435	12.015	3.31988	0.00237173	0.0214899	-1.83947		2.16498
P19338	-0.461178	11.8707	-3.31761	0.00238577	0.0214899	-1.84831		0.726393
P02792	0.792956	16.1488	3.29826	0.00250927	0.0224337	-1.886		1.73262
P04259;P04264;P05787;P13647	0.577715	10.6259	3.2953	0.00252869	0.0224398	-1.89794		1.49248
P02787	0.948655	18.2302	3.28462	0.00259995	0.0229025	-1.94394		1.93007
Q9BRX8	-0.874058	11.8807	-3.27477	0.0026674	0.0231561	-1.9509		0.54561
P07358	0.785048	13.8858	3.27518	0.00266456	0.0231561	-1.96965		1.72315
A0A0C4DH38	1.03315	12.9018	3.25091	0.00283786	0.0244587	-2.01943		2.04648
P02647	0.704671	18.6028	3.23398	0.00296501	0.025372	-2.05762		1.62977
Q9Y2A7	-0.624333	11.0435	-3.22421	0.00304089	0.0257854	-2.08427		0.64872
P43034	-0.400021	12.896	-3.22225	0.00305636	0.0257854	-2.08861		0.757847
P07900;P08238;Q14568	-0.460969	14.0096	-3.20649	0.00318329	0.0266684	-2.12251		0.726498
P11597	0.642418	10.7294	3.19142	0.00330928	0.0275314	-2.14449		1.56094
P06310	1.1048	14.549	3.17967	0.0034109	0.0278704	-2.19178		2.1507
P49591	-0.636313	12.5653	-3.18072	0.00340174	0.0278704	-2.2032		0.643355
Q92747	-0.680655	12.0756	-3.17426	0.00345868	0.0279966	-2.2034		0.623882
P07585	0.722674	12.5533	3.17866	0.00341982	0.0278704	-2.21208		1.65024
P05109	1.18851	14.5854	3.17142	0.00348407	0.0280128	-2.22946		2.27918
Q99685	0.428935	12.4378	3.1569	0.00361635	0.0286913	-2.2345		1.34624
Q8IUX7	-0.58964	15.8964	-3.15766	0.00360928	0.0286913	-2.24469		0.664509
P23219	0.3924	10.8964	3.14044	0.00377216	0.0293739	-2.26734		1.31258
P25788	-0.386666	11.479	-3.14376	0.00374023	0.0293739	-2.26906		0.764895
A0A075B6R2;P06331;P0DP08	1.22677	12.7894	3.13752	0.00380046	0.0293739	-2.27327		2.34043
P11216	-0.499848	14.6266	-3.13758	0.00379989	0.0293739	-2.27927		0.707181
Q7Z4H8	-0.447374	14.5187	-3.12879	0.00388625	0.0298444	-2.30431		0.733376
Q709C8	0.412629	11.3956	3.11317	0.00404445	0.0304733	-2.32576		1.33111
Q9UDY2	-0.838691	11.4819	-3.12007	0.00397382	0.0303225	-2.34593		0.559151
P18206	-0.757447	17.1355	-3.1146	0.00402969	0.0304733	-2.35091		0.591542
P08185	0.718378	10.3293	3.0966	0.00421892	0.0315892	-2.37684		1.64533
P02788	0.808716	11.3852	3.09388	0.00424823	0.0316111	-2.38696		1.75165
Q9UBX5	-1.32133	16.4703	-3.08357	0.00436123	0.0322516	-2.42713		0.400165
A0A0B4J1X5;P01780;P0DOX2	1.59728	14.8784	3.06651	0.00455428	0.0329655	-2.44415		3.02573
P07225	0.622215	14.3829	3.07	0.00451416	0.0329655	-2.44919		1.53924
P06727	0.854871	15.5251	3.07445	0.00446347	0.0328051	-2.45526		1.8086
Q9UNH7	-0.350818	11.7113	-3.06534	0.00456784	0.0329655	-2.46753		0.784139
P06753;P07951;P09493;P67936	-0.966798	18.539	-3.05644	0.00467216	0.0335165	-2.49637		0.51164
P43487	0.298817	10.8742	3.02543	0.00505333	0.0360351	-2.55014		1.23014
P02533;P08727;P08779;P13645;Q04695	-0.492657	15.4718	-3.00913	0.00526531	0.0373245	-2.61036		0.710715
P02511	-0.583642	14.499	-2.98472	0.00559873	0.0389958	-2.62696		0.667277
Q8NDH3	0.543285	10.527	2.99303	0.00548302	0.0386392	-2.6432		1.45729
P47914	-0.564153	13.3486	-2.9856	0.00558636	0.0389958	-2.64744		0.676352
Q68EM7	-0.523528	9.95384	-2.97984	0.00566771	0.0392481	-2.66935		0.695669
A6NCE7;Q9GZQ8	-0.380285	12.0519	-2.97428	0.00574723	0.03957	-2.67337		0.768286
P36871	-0.463454	13.652	-2.95159	0.00608317	0.0413391	-2.71242		0.725248
P05121	0.617152	12.191	2.94998	0.0061077	0.0413391	-2.71797		1.53384
P39019	-0.724278	12.3283	-2.95614	0.00601435	0.0411726	-2.72537		0.6053
Q96RW7	-0.546958	12.6379	-2.93501	0.00634031	0.0422494	-2.75031		0.684462
P04216	-0.543114	15.2538	-2.92864	0.00644181	0.0422494	-2.75844		0.686288
A0A0B4J1X5;P01764	1.22135	13.5106	2.93953	0.00626925	0.0421942	-2.77075		2.33165
Q9Y490;Q9Y4G6	-0.714645	12.8867	-2.92849	0.00644418	0.0422494	-2.78199		0.609355
P40123	-0.587704	12.2372	-2.92789	0.00645379	0.0422494	-2.78384		0.665401
P08709	1.0574	11.712	2.93024	0.00641609	0.0422494	-2.78644		2.08118
P35637	0.35246	10.9078	2.92331	0.00652789	0.0425023	-2.79219		1.27674
P08238	-0.498931	13.8142	-2.89884	0.00693722	0.0446817	-2.80958		0.707631
Q9NVD7	-0.559281	15.1317	-2.90852	0.00677246	0.0438563	-2.8202		0.67864
P15502	-0.860061	10.4576	-2.89207	0.00705478	0.0451959	-2.85867		0.550929
Q9Y6R7	0.578945	13.3113	2.87518	0.00735601	0.0463816	-2.87221		1.49376
P36980;Q03591	1.50013	12.4312	2.88866	0.00711468	0.0453372	-2.88046		2.82868
Q9Y265	-0.430712	12.8674	-2.87635	0.00733471	0.0463816	-2.91779		0.741896
P08637	0.467826	10.8613	2.85441	0.00774312	0.0480609	-2.93596		1.38302
P48745	-0.697151	12.0273	-2.85935	0.00764937	0.0477289	-2.94335		0.616789
P46777	-0.659334	12.0062	-2.85034	0.00782126	0.0480609	-2.94505		0.633171
P38606	0.37437	13.0136	2.86165	0.00760607	0.0477072	-2.9534		1.29627
Q8N436	-0.62217	13.7641	-2.85025	0.00782293	0.0480609	-2.96538		0.649693
P04259;P05787;P08729;P13647;P35908;Q7RTS7;Q86Y46	-0.855646	14.012	-2.84813	0.00786388	0.048066	-2.96933		0.552618
Q96Q11	-0.382788	10.5601	-2.83654	0.00809144	0.0492058	-2.98729		0.766954
Q9UKM9	-0.32644	10.8602	-2.82019	0.008423	0.0507073	-2.99763		0.797502
P01024	0.664664	16.1687	2.8269	0.00828553	0.0501316	-3.0212		1.5852
Q9BSJ8	-0.482266	13.2508	-2.81712	0.00848666	0.0508351	-3.03858		0.715852
Q9P2E9	-0.565321	11.7849	-2.80257	0.00879461	0.0524176	-3.07556		0.675805
Q6EMK4	-0.303567	10.714	-2.78099	0.00927079	0.0544953	-3.09405		0.810246
P06737;P11216;P11217	-0.542955	14.4949	-2.78654	0.00914601	0.0542422	-3.10286		0.686364
Q6IBS0	0.361906	12.1745	2.77986	0.00929635	0.0544953	-3.10733		1.28512
Q9UQ80	-0.400431	11.8523	-2.76797	0.00956942	0.0556513	-3.11734		0.757632
Q99733	-0.629133	13.3231	-2.77859	0.00932516	0.0544953	-3.13019		0.646565
Q6IAA8	-0.344476	11.4062	-2.75728	0.00982143	0.056297	-3.13691		0.787594
P07737	-0.413957	16.8516	-2.76498	0.00963929	0.0557868	-3.14375		0.750562
Q9NZU5	-0.707334	15.3056	-2.75412	0.0098972	0.0564017	-3.15193		0.612451
Q9UMS4	-0.998613	11.7004	-2.76253	0.00969698	0.0558509	-3.16776		0.500481
P41226	0.319211	12.1689	2.7526	0.00993385	0.0564017	-3.18002		1.24765
Q8N335	-0.458187	12.221	-2.74035	0.0102333	0.0574289	-3.18895		0.7279
Q96HF1	0.610056	12.8361	2.73673	0.0103234	0.0575232	-3.21703		1.52632
P00736	0.505441	13.9839	2.73934	0.0102586	0.0574289	-3.21893		1.41956
Q9Y6E0	-0.536053	11.0841	-2.73976	0.0102481	0.0574289	-3.22279		0.689655
Q92544	0.743729	12.227	2.72694	0.0105712	0.058537	-3.23839		1.6745
P05543	0.849667	11.0748	2.72569	0.0106031	0.058537	-3.24813		1.80209
Q8TD55	0.51602	11.7894	2.71031	0.0110044	0.0604736	-3.27363		1.43
Q6NVY1	-0.438181	11.7468	-2.70762	0.0110758	0.0605883	-3.2901		0.738064
P35613	0.424525	11.3609	2.68325	0.0117447	0.0633622	-3.30457		1.34213
P05198	-0.543097	12.4784	-2.69634	0.011381	0.0619747	-3.31877		0.686296
P07814	-0.388272	10.7338	-2.67317	0.0120322	0.0635004	-3.33616		0.764044
P49913	1.34565	11.2586	2.68591	0.01167	0.0632609	-3.33988		2.54144
Q99541	1.00243	11.6407	2.67896	0.0118663	0.0634636	-3.33996		2.00337
P01023;P20742	0.738607	15.6425	2.68149	0.0117945	0.0633622	-3.34311		1.66856
P50225	0.559801	11.5482	2.67542	0.0119674	0.0635004	-3.3468		1.47407
P01023	0.669472	16.6939	2.67369	0.0120173	0.0635004	-3.37073		1.59049
P01033	1.02819	12.6498	2.64791	0.0127816	0.0671597	-3.41378		2.03946
A0A0C4DH67	0.766158	10.6344	2.61233	0.0139108	0.0727736	-3.46616		1.70073
P01859;P0DOX5	0.743954	15.9984	2.59036	0.0146537	0.0758224	-3.50277		1.67476
O00182	0.461502	11.0089	2.58549	0.0148235	0.0758912	-3.53075		1.37697
Q9Y281	-0.596197	12.3617	-2.59248	0.0145804	0.0758224	-3.53139		0.661496
Q7RTS7;Q86Y46	0.406551	10.9994	2.57503	0.0151937	0.077142	-3.5317		1.32551
P00387	-0.434398	14.854	-2.58768	0.0147468	0.0758224	-3.54188		0.740003
P42025;P61163	-0.483139	13.0225	-2.58937	0.0146882	0.0758224	-3.54868		0.715419
Q8TED1	-0.362793	11.9368	-2.54807	0.016188	0.0798073	-3.56411		0.777658
P01859	0.78552	16.0293	2.57495	0.0151966	0.077142	-3.56598		1.72371
Q9Y287	0.730447	11.2009	2.56246	0.01565	0.0787759	-3.57633		1.65915
P05107	0.572501	12.6693	2.57036	0.0153617	0.0776512	-3.57796		1.4871
P07333	0.407419	11.8619	2.55238	0.0160253	0.0798073	-3.59426		1.32631
Q8NFW8	-0.354093	11.1147	-2.54996	0.0161165	0.0798073	-3.6013		0.782361
Q9UBE0	0.368148	9.18183	2.55221	0.0160317	0.0798073	-3.60755		1.29069
Q6NZ67;Q6P582	-0.498124	11.019	-2.54853	0.0161707	0.0798073	-3.61807		0.708027
P06756	-0.333439	14.3835	-2.53949	0.0165169	0.0810954	-3.63987		0.793642
P07858	0.516595	15.2418	2.52688	0.0170116	0.0831831	-3.66602		1.43058
A0A075B6R9;A0A0C4DH68	0.720962	12.1425	2.52197	0.0172077	0.0837999	-3.68391		1.64828
P09382	-0.491404	15.5416	-2.51372	0.0175419	0.0850816	-3.69931		0.711333
P46976	-0.433369	13.3632	-2.50176	0.0180373	0.0867818	-3.70344		0.74053
P35637;Q92804	0.357694	10.7612	2.48938	0.0185636	0.0889566	-3.71743		1.28138
P06753	0.383953	12.785	2.50612	0.0178553	0.0862525	-3.72652		1.30491
Q9BRG1	-0.336362	11.7345	-2.48467	0.0187674	0.089575	-3.7567		0.792036
Q9Y2S2	0.29132	11.4609	2.47081	0.0193796	0.0914131	-3.76417		1.22376
P01859;P01860;P01861	1.364	17.2342	2.47672	0.0191162	0.090878	-3.77361		2.57399
P26640	-0.371696	11.6889	-2.46368	0.0197015	0.0918938	-3.79246		0.772873
P48643	-0.411892	13.5592	-2.47077	0.0193814	0.0914131	-3.79462		0.751637
Q9NR46	-0.319265	11.5391	-2.46355	0.0197076	0.0918938	-3.79478		0.801478
P43121	-0.554265	13.8214	-2.46342	0.0197134	0.0918938	-3.81945		0.681004
P04083	-0.385674	17.341	-2.45261	0.0202109	0.0938476	-3.8217		0.765421
P36551	0.327361	11.447	2.42778	0.0213983	0.0985967	-3.83465		1.25472
O00186	-0.221249	9.5915	-2.41169	0.022201	0.101515	-3.83493		0.857823
Q86UP2	-0.219422	11.6475	-2.44183	0.0207189	0.0958349	-3.83925		0.85891
A1L4H1	0.873234	12.4982	2.41633	0.0219668	0.100828	-3.89899		1.83176
P37837	0.364271	14.4047	2.39597	0.0230121	0.104823	-3.92931		1.28723
P01860;P01861;P0DOX5	0.477904	17.1478	2.39056	0.0232975	0.104926	-3.93586		1.39272
P38919;P60842;Q14240	-0.456987	11.9029	-2.39107	0.0232703	0.104926	-3.9404		0.728506
Q8IV08	0.457748	12.4163	2.39129	0.0232585	0.104926	-3.948		1.3734
P08865	-0.311621	12.4446	-2.37093	0.0243597	0.10811	-3.95967		0.805736
P01591	0.611432	12.7647	2.37874	0.0239317	0.107379	-3.96314		1.52778
P07900	-0.491966	14.3044	-2.36621	0.0246215	0.108843	-3.96675		0.711056
P23368	0.372502	11.7734	2.37083	0.0243653	0.10811	-3.9874		1.2946
P50570	-0.355685	12.1985	-2.37639	0.0240598	0.107551	-3.98851		0.781499
P28676	-0.539919	11.9456	-2.35479	0.0252664	0.111283	-4.03039		0.68781
O00339	-0.479623	10.7414	-2.33225	0.026583	0.114556	-4.03511		0.717165
P21399	-0.271889	13.1212	-2.34472	0.0258472	0.112851	-4.04002		0.828234
P46087	0.478458	11.1419	2.34212	0.025999	0.112851	-4.04569		1.39325
Q9UBV8	-0.613897	11.5585	-2.34424	0.025875	0.112851	-4.05439		0.653429
A0A075B6K4	1.03833	11.6852	2.34334	0.0259276	0.112851	-4.05925		2.05385
P01889	0.654712	10.7607	2.33257	0.0265642	0.114556	-4.0665		1.5743
Q9UHV9	0.370653	11.8738	2.3244	0.0270566	0.116179	-4.07244		1.29294
P48444	-0.287623	12.4685	-2.31346	0.0277282	0.117379	-4.0934		0.819251
Q9Y490	-0.658847	15.8935	-2.31912	0.0273788	0.117142	-4.09356		0.633384
P00338	-0.354233	15.7314	-2.31663	0.0275322	0.117379	-4.10352		0.782285
P06737;P11217	-0.385461	12.6684	-2.28347	0.0296491	0.124194	-4.1162		0.765534
P05556	-0.552522	15.5145	-2.31394	0.0276985	0.117379	-4.12124		0.681827
A0FGR8	-0.467694	11.1635	-2.30057	0.0285399	0.12039	-4.15018		0.723119
P02462	0.222821	13.5421	2.25627	0.0314939	0.130281	-4.15082		1.16701
P04080	0.509649	12.7994	2.28658	0.0294442	0.123769	-4.16592		1.4237
Q9UBI6	-0.410859	13.2523	-2.27576	0.030162	0.125903	-4.18053		0.752175
P41252	-0.631531	10.5937	-2.27293	0.030352	0.126256	-4.18687		0.645491
P40939	-0.312793	14.1641	-2.25397	0.0316545	0.130316	-4.20034		0.805082
P08123	0.353672	12.7088	2.25565	0.0315372	0.130281	-4.21475		1.27781
Q9NR12	-0.83757	14.6871	-2.24426	0.0323413	0.13198	-4.21772		0.559585
Q8WWX9	-0.324838	12.506	-2.24359	0.032389	0.13198	-4.2364		0.798388
P27824	-0.324834	14.9221	-2.24902	0.0320032	0.131301	-4.23776		0.79839
P08571	0.341066	13.7547	2.23704	0.0328603	0.133446	-4.25149		1.26669
P33316	-0.352998	11.819	-2.23377	0.0330976	0.133505	-4.25639		0.782956
P36578	-0.75005	10.9905	-2.22585	0.0336793	0.135395	-4.25908		0.594583
Q641Q2;Q9Y4E1	-0.335739	10.5162	-2.20572	0.0351997	0.139467	-4.27216		0.792378
P07951;P09493	-0.818651	17.4628	-2.23546	0.0329748	0.133459	-4.27779		0.566972
P26196	-0.422505	10.6953	-2.21591	0.0344223	0.137919	-4.28552		0.746128
P33121	0.232216	12.311	2.20646	0.035143	0.139467	-4.29545		1.17464
Q9P2R7	0.317765	10.734	2.20458	0.0352875	0.139467	-4.30173		1.2464
P37802	-0.621957	16.7946	-2.21325	0.0346242	0.138266	-4.32074		0.649789
P09525	-0.37851	15.6901	-2.20325	0.0353907	0.139467	-4.32133		0.769232
Q9UPN4	-0.81899	12.3647	-2.20149	0.0355266	0.139544	-4.34335		0.566839
O95865	-0.273691	13.7523	-2.17821	0.0373763	0.14337	-4.34502		0.8272
P29350	0.408305	10.337	2.1868	0.036684	0.141766	-4.34577		1.32713
Q92896	-0.368752	11.3267	-2.18315	0.0369771	0.142439	-4.34636		0.774452
P21291	-0.765773	15.8221	-2.19264	0.0362204	0.140883	-4.34727		0.588138
P11310	-0.316955	11.6494	-2.17583	0.0375703	0.14337	-4.34843		0.802762
P18428	0.559639	14.9414	2.19476	0.0360527	0.140688	-4.34943		1.4739
P26599	-0.393637	13.7024	-2.19662	0.0359067	0.140576	-4.34983		0.761208
Q96A00	-0.428159	12.2034	-2.1739	0.037728	0.143486	-4.3555		0.74321
P22626	-0.305978	14.937	-2.18712	0.0366583	0.141766	-4.36068		0.808894
Q9NSD9	-0.319865	10.9703	-2.17574	0.0375777	0.14337	-4.37746		0.801145
P22307	0.216383	12.8589	2.15556	0.0392587	0.147899	-4.39307		1.16182
A0M8Q6;P0CF74;P0DOY3	0.791155	15.382	2.16143	0.0387624	0.14649	-4.4		1.73046
Q9NT62	0.379204	10.3376	2.17079	0.0379841	0.144003	-4.40198		1.30062
P07339	-0.260348	17.0939	-2.14573	0.0401012	0.149661	-4.40963		0.834887
P46937	-0.302238	12.5779	-2.14087	0.0405236	0.150768	-4.42383		0.810993
P19784	0.345007	10.5936	2.14754	0.0399446	0.149543	-4.42529		1.27016
P01871	0.59509	19.4536	2.14894	0.0398244	0.149543	-4.42767		1.51057
P06681	0.303891	13.6191	2.13387	0.0411386	0.151659	-4.44681		1.23447
P07360	0.476096	13.2291	2.13383	0.0411428	0.151659	-4.45431		1.39097
P07951	-0.587024	16.4126	-2.13414	0.0411147	0.151659	-4.45572		0.665715
P15259;P18669	-0.428807	17.0819	-2.1288	0.0415902	0.152837	-4.47292		0.742876
P49247	0.369728	11.4966	2.11547	0.0427971	0.156792	-4.49405		1.29211
P48449	-0.273472	11.8326	-2.08369	0.0458005	0.161389	-4.49646		0.827326
O95967	-0.597305	13.5314	-2.09725	0.0444966	0.161389	-4.5232		0.660987
P05386	-0.637005	15.8914	-2.09082	0.0451102	0.161389	-4.5233		0.643046
Q9Y5K6	-0.287817	11.0692	-2.08765	0.0454159	0.161389	-4.52606		0.81914
P00492	0.35576	12.9657	2.09317	0.0448855	0.161389	-4.52703		1.27966
P07900;P08238	-0.347485	13.7445	-2.09373	0.0448318	0.161389	-4.52855		0.785953
P08294	-0.682562	16.707	-2.09942	0.044291	0.161389	-4.52973		0.623058
Q9NTK5	-0.46302	12.7084	-2.09416	0.0447906	0.161389	-4.5344		0.725466
Q86VN1	-0.260454	10.3535	-2.08366	0.0458031	0.161389	-4.53668		0.834825
Q9BTV4	-0.516511	12.095	-2.09439	0.0447685	0.161389	-4.5447		0.69906
Q9NZM1	-0.478505	12.6829	-2.08654	0.0455235	0.161389	-4.55757		0.717721
A5A3E0;P0CG38;P0CG39;P68133;Q9BYX7	-0.669272	18.3354	-2.08475	0.0456974	0.161389	-4.55765		0.628824
P01860;P0DOX5	1.04543	15.1913	2.08458	0.0457139	0.161389	-4.55924		2.06398
P06703	-0.438434	12.1753	-2.08222	0.0459438	0.16141	-4.56288		0.737935
P01860	0.534141	17.1369	2.05014	0.0491725	0.16831	-4.57351		1.44808
Q92499	-0.370344	11.0253	-2.0656	0.0475919	0.166225	-4.58041		0.773598
Q96F85	0.298394	10.3031	2.05408	0.048765	0.167985	-4.58209		1.22977
P40227	-0.186266	11.8945	-2.03636	0.0506192	0.172456	-4.58394		0.878878
P11413	-0.319226	15.3062	-2.06675	0.047476	0.166225	-4.58926		0.8015
P01911	0.673253	11.7361	2.05383	0.0487908	0.167985	-4.58946		1.59466
Q9Y696	-0.275941	13.7516	-2.0615	0.0480067	0.167186	-4.58971		0.825912
Q9Y333	-0.381356	12.15	-2.05377	0.048797	0.167985	-4.59997		0.767716
P27338	-0.415873	11.019	-2.05073	0.0491109	0.16831	-4.60134		0.749566
P04843	-0.469203	12.7456	-2.03337	0.0509383	0.172456	-4.61442		0.722364
P05546	0.911721	13.8265	2.05473	0.0486981	0.167985	-4.61814		1.88129
Q9UHD8	-0.254943	11.8749	-2.03421	0.050848	0.172456	-4.62731		0.83802
Q9BW30	0.38822	10.3124	2.03305	0.0509718	0.172456	-4.63441		1.30878
P22105	-0.654234	14.8367	-2.03183	0.0511033	0.172456	-4.64006		0.635413
P50395	-0.232328	14.5691	-2.02453	0.0518911	0.173647	-4.64377		0.85126
Q9Y6N5	-0.203789	11.9028	-2.00621	0.053916	0.178429	-4.64678		0.868267
Q92629	-0.522541	11.5448	-2.02816	0.0514982	0.1733	-4.64966		0.696145
P23634	-0.265134	12.7085	-2.02514	0.0518247	0.173647	-4.65198		0.832122
Q13131	-0.335289	10.3608	-2.01448	0.052994	0.176839	-4.6775		0.792625
P17301	0.346609	10.2932	2.00998	0.0534936	0.177522	-4.68291		1.27157
O95881	0.36311	11.5109	2.00459	0.0540989	0.178541	-4.68765		1.2862
Q9BS40	0.411207	11.3554	2.01316	0.0531403	0.176839	-4.68891		1.3298
Q6PIU2	0.262117	10.9931	1.97174	0.0579154	0.187521	-4.70488		1.19924
P23141	-0.340161	13.498	-2.00215	0.0543743	0.178957	-4.70564		0.789953
Q9UBG0	0.287903	13.1255	1.9875	0.0560565	0.183016	-4.71979		1.22086
P23528;Q9Y281	-0.202976	16.6402	-1.96286	0.0589873	0.189598	-4.7227		0.868757
Q8IZP0	-0.283335	10.8645	-1.98742	0.0560659	0.183016	-4.72521		0.821689
P43251	0.460273	10.5709	1.97507	0.0575179	0.186738	-4.72935		1.3758
P09467	0.697176	14.1756	1.98864	0.0559239	0.183016	-4.73388		1.62133
P02749	0.33001	17.1119	1.95446	0.0600161	0.192049	-4.73497		1.25702
Q9Y259	-0.355989	11.1363	-1.97883	0.0570728	0.185797	-4.74599		0.781334
P00338;P07195;P07864	-0.497183	17.9363	-1.95366	0.0601155	0.192049	-4.76224		0.708489
P29692	-0.575434	13.0462	-1.96818	0.0583436	0.188398	-4.76322		0.671084
Q86UX7	0.369864	13.1222	1.96249	0.0590316	0.189598	-4.77746		1.29223
Q8NFF5	-0.243466	10.8883	-1.94491	0.0612056	0.194494	-4.7817		0.844713
Q96AY3	-0.564362	13.5373	-1.94108	0.061688	0.195508	-4.79039		0.676254
Q8TC12	-0.346099	10.3351	-1.95022	0.0605415	0.192895	-4.7951		0.786708
P35754	0.407692	12.2868	1.93145	0.0629164	0.197314	-4.79637		1.32656
Q9UKU9	-0.383388	13.0547	-1.93479	0.0624874	0.196566	-4.807		0.766635
Q6UVK1	-0.390814	12.9246	-1.93759	0.0621312	0.196394	-4.80751		0.762699
P08670;P17661	-0.464832	16.11	-1.93459	0.0625138	0.196566	-4.81318		0.724556
P09496	-0.183618	12.4872	-1.90059	0.0669962	0.206859	-4.82722		0.880492
P02461	0.270059	11.9873	1.9077	0.0660359	0.205483	-4.83495		1.20586
P07099	0.331626	13.4413	1.92639	0.0635696	0.198842	-4.8374		1.25843
Q9UI12	0.324658	11.7629	1.90841	0.0659408	0.205483	-4.8533		1.25237
P16284	0.353623	10.718	1.90293	0.066678	0.206409	-4.8557		1.27777
P30049	0.408737	11.8537	1.90384	0.0665552	0.206409	-4.8596		1.32752
Q9UIA9	0.263951	9.66721	1.89682	0.0675102	0.207546	-4.86341		1.20076
Q9P0J1	-0.341136	12.2959	-1.89327	0.0679967	0.207546	-4.86948		0.789419
P02656	0.530104	13.7964	1.88801	0.068723	0.208431	-4.88554		1.44403
P28161	-0.373954	12.8203	-1.89482	0.0677835	0.207546	-4.88798		0.771664
P09493	-0.561697	16.11	-1.89263	0.068085	0.207546	-4.89542		0.677505
P40306	0.298709	11.0948	1.87963	0.0698959	0.21092	-4.90184		1.23004
P27361	-0.33556	11.7593	-1.89292	0.0680441	0.207546	-4.90359		0.792477
Q7L5N1	-0.291153	10.2469	-1.89088	0.0683254	0.207751	-4.90688		0.817248
P49746	-0.308527	11.6323	-1.88071	0.0697433	0.21092	-4.91043		0.807466
P36776	-0.347572	11.07	-1.87188	0.0709947	0.21349	-4.91275		0.785906
P07357	0.560076	12.1718	1.87112	0.0711041	0.21349	-4.9403		1.47435
A1L0T0	-0.324195	11.0044	-1.86036	0.072656	0.217605	-4.94284		0.798744
P30050	-0.484487	11.2428	-1.8544	0.0735295	0.219125	-4.95023		0.714751
P00568	-0.547492	13.8331	-1.85	0.0741794	0.220513	-4.95529		0.684208
P04181	-0.266888	12.064	-1.85548	0.0733699	0.219125	-4.95735		0.831111
P23528;P60981;Q9Y281	-0.640004	10.8841	-1.81571	0.079416	0.230923	-4.96298		0.641711
Q99622	-0.280924	11.0489	-1.82757	0.07757	0.22721	-4.9648		0.823064
Q86V88	-0.426469	11.3354	-1.84575	0.0748115	0.221842	-4.96822		0.744081
P30837	-0.551082	14.6009	-1.83307	0.0767264	0.226349	-4.97143		0.682508
E9PAV3	-0.56606	11.6291	-1.83235	0.0768357	0.226349	-4.97822		0.675459
Q96P48	0.542348	11.9069	1.83194	0.0768982	0.226349	-4.99101		1.45634
Q9BRR6	0.436709	10.8186	1.82907	0.077338	0.227086	-4.99428		1.35351
Q9UNS2	0.316486	13.9933	1.80529	0.0810674	0.232644	-5.00008		1.24529
P01599	0.497854	12.2428	1.80342	0.0813673	0.232644	-5.00115		1.41211
Q8NBS9	-0.247899	14.4612	-1.80392	0.0812876	0.232644	-5.00135		0.842122
P04003	0.683501	14.5994	1.82512	0.0779478	0.22776	-5.01313		1.60603
P05787;P08670;P08729;P17661	-0.342799	15.6267	-1.80429	0.0812275	0.232644	-5.01779		0.78851
P42330	-0.328891	12.2427	-1.80874	0.0805176	0.232434	-5.02377		0.796148
Q86VR2	-0.183218	10.817	-1.79213	0.083196	0.235624	-5.02522		0.880737
P06733	-0.312851	18.0768	-1.81673	0.0792548	0.230923	-5.02789		0.80505
Q9BSJ2	0.432261	12.8345	1.81173	0.0800431	0.231622	-5.03605		1.34935
P29992;P50148	-0.465965	12.8431	-1.81182	0.0800287	0.231622	-5.03807		0.723987
P07384	-0.199401	13.3004	-1.80203	0.0815902	0.232726	-5.03899		0.870912
P35749	-0.588767	13.3255	-1.80002	0.0819147	0.233097	-5.0454		0.664911
Q9NTJ4	0.25858	10.4431	1.76461	0.0878024	0.243489	-5.0455		1.1963
Q9NUQ9	0.353168	11.6931	1.79586	0.082588	0.234456	-5.04998		1.27736
Q8N2S1	-0.390105	13.1136	-1.77192	0.0865588	0.241599	-5.06683		0.763074
Q9BX66	-0.762823	13.9319	-1.78797	0.0838798	0.237	-5.06697		0.589342
P07711	0.547818	12.897	1.77111	0.0866951	0.241599	-5.06813		1.46187
P42166;P42167	-0.254781	11.8704	-1.75865	0.0888282	0.244635	-5.07025		0.838115
P26447	-0.455796	16.683	-1.78235	0.08481	0.239064	-5.07147		0.729108
Q96EP5	-0.337828	11.7221	-1.77323	0.0863374	0.241599	-5.07638		0.791231
Q96EQ0	0.385547	10.7875	1.77744	0.0856297	0.240809	-5.08019		1.30635
P02753	0.508462	12.511	1.76979	0.0869193	0.241599	-5.08778		1.42253
P07686	0.18075	11.128	1.74033	0.0920431	0.249562	-5.09541		1.13347
Q9UGI8	-0.67759	11.6879	-1.7609	0.0884399	0.244448	-5.10126		0.625209
P48556	0.189553	10.9675	1.7453	0.0911615	0.249562	-5.10222		1.14041
P23246	-0.23547	12.8175	-1.77008	0.0868698	0.241599	-5.10622		0.849408
Q9BW91	-0.220239	9.43866	-1.7367	0.0926931	0.250104	-5.10802		0.858423
P43304	0.227729	12.0172	1.76022	0.0885563	0.244448	-5.11112		1.17099
P02549	0.330635	10.6282	1.74418	0.0913606	0.249562	-5.11403		1.25757
Q9NY33	0.248202	11.4119	1.75605	0.0892784	0.245311	-5.11647		1.18773
P28074	-0.289172	11.733	-1.73899	0.0922838	0.249562	-5.1179		0.818372
Q92538	0.216688	10.2833	1.71442	0.0967587	0.258743	-5.11897		1.16206
P24593	-0.17956	12.231	-1.73967	0.0921618	0.249562	-5.12621		0.882972
P00558	-0.291945	16.1344	-1.74159	0.0918196	0.249562	-5.1435		0.8168
P04899	-0.189083	14.7382	-1.7172	0.0962442	0.257943	-5.14978		0.877163
P19367	-0.289067	10.8963	-1.73927	0.0922322	0.249562	-5.15546		0.818431
P01834;P0DOX7	0.48372	17.0751	1.70837	0.0978891	0.25979	-5.15569		1.39834
P41222	0.576335	11.3325	1.71744	0.0961999	0.257943	-5.17779		1.49106
Q8WX93	-0.579729	13.2291	-1.71977	0.0957687	0.257822	-5.18055		0.669089
P36543	0.236692	11.5178	1.71274	0.0970726	0.259004	-5.18295		1.17829
P49589	-0.18221	10.885	-1.6632	0.10668	0.274254	-5.18397		0.881352
P15498	-0.394385	13.8309	-1.7092	0.097733	0.25979	-5.18656		0.760814
P07437;P68371;Q13885	-0.176695	15.135	-1.66671	0.105973	0.273499	-5.19038		0.884727
P49419	-0.294587	13.4072	-1.70422	0.0986707	0.260944	-5.19378		0.815306
P05023	-0.225376	12.3719	-1.6938	0.100656	0.263876	-5.20133		0.855372
P21333	-1.12367	18.2094	-1.70769	0.0980175	0.25979	-5.20883		0.458924
P08758	-0.336453	16.935	-1.70246	0.0990035	0.261247	-5.21311		0.791986
P46926;Q8TDQ7	-0.210486	11.4758	-1.66895	0.105525	0.273499	-5.21888		0.864246
A0A075B6K2;A0A075B6K5;P80748	0.855973	12.2188	1.6919	0.101021	0.264244	-5.22581		1.80998
P02679	0.812461	16.8491	1.6952	0.100386	0.263876	-5.22908		1.75621
P46063	-0.248929	10.3421	-1.66851	0.105613	0.273499	-5.22953		0.841521
P04040	0.389696	13.5914	1.69377	0.100661	0.263876	-5.23089		1.31012
P02652	0.688922	15.6267	1.68243	0.102859	0.268464	-5.24143		1.61208
P04424	0.218994	11.1562	1.67178	0.10496	0.273354	-5.25142		1.16392
Q9UJ70	0.284949	13.9442	1.66615	0.106086	0.273499	-5.26412		1.21837
Q9Y5L4	-0.432544	11.5553	-1.65622	0.108093	0.276138	-5.26781		0.740954
P08134	0.550212	11.8526	1.65391	0.108565	0.276138	-5.26811		1.4643
Q9BUP0	-0.302589	13.0871	-1.66579	0.106158	0.273499	-5.26932		0.810796
Q8IXL7	-0.269547	11.0318	-1.63778	0.111909	0.282841	-5.27067		0.82958
Q9ULZ3	0.29054	12.429	1.65626	0.108086	0.276138	-5.2718		1.2231
P16157	-0.26688	10.6612	-1.63071	0.113399	0.284751	-5.2745		0.831115
Q96I99	0.190311	10.924	1.65489	0.108366	0.276138	-5.27817		1.14101
Q8WUH6	0.417869	9.9103	1.6441	0.11059	0.280692	-5.28858		1.33595
O00151	-0.571395	14.9277	-1.65563	0.108215	0.276138	-5.28945		0.672966
Q96AE4	0.238428	12.5253	1.63363	0.112781	0.283848	-5.2926		1.17971
P31153	0.226615	12.2828	1.62485	0.11465	0.284751	-5.29429		1.17009
P21333;Q14315	-0.647366	11.6055	-1.6411	0.111213	0.281677	-5.29719		0.638445
P17987	-0.168055	11.7481	-1.62158	0.115349	0.285514	-5.30201		0.890042
Q8WTS6	-0.222579	10.8465	-1.62786	0.114005	0.284751	-5.30322		0.857032
P50148	-0.33582	11.3826	-1.62575	0.114457	0.284751	-5.30658		0.792334
Q8NCN5	0.311705	11.3332	1.63614	0.112254	0.283116	-5.30769		1.24117
P04632	-0.196863	12.558	-1.62478	0.114665	0.284751	-5.31898		0.872446
P42330;Q04828	-0.340312	11.0924	-1.62885	0.113795	0.284751	-5.32374		0.789871
Q96C19	0.285589	10.9365	1.59927	0.120233	0.291313	-5.32549		1.21891
A5A3E0;P0CG38;P0CG39;P68133	-0.527427	11.5061	-1.61518	0.116735	0.287754	-5.32905		0.693791
Q96FQ6	-0.40485	11.3962	-1.62043	0.115597	0.285537	-5.33263		0.755315
P37840	0.531732	11.2976	1.62413	0.114804	0.284751	-5.33525		1.44566
P50402	-0.32253	10.8015	-1.60143	0.119753	0.291313	-5.33743		0.799666
Q99439	-0.339648	14.6946	-1.59758	0.120611	0.291313	-5.33767		0.790234
P07998	0.673841	11.0717	1.60519	0.118922	0.290753	-5.33906		1.59531
P49961	-0.315399	10.7373	-1.61405	0.11698	0.287766	-5.33957		0.803629
Q9UNN8	0.242361	11.5464	1.60929	0.11802	0.289729	-5.3403		1.18293
Q8IWA5	0.282224	11.0467	1.59117	0.122047	0.294191	-5.34945		1.21607
P01889;P04439	0.365908	13.889	1.60315	0.119371	0.291257	-5.34979		1.28869
P22694	-0.307865	11.8693	-1.58729	0.122925	0.295712	-5.35304		0.807837
P17900	0.405851	11.4136	1.60775	0.118359	0.289967	-5.35381		1.32487
A5A3E0;P68133;Q562R1;Q9BYX7	-0.591734	12.5912	-1.59785	0.120551	0.291313	-5.35594		0.663545
Q7Z6Z7	-0.275896	12.0601	-1.59966	0.120146	0.291313	-5.35948		0.825937
Q99538	0.258838	10.8032	1.58433	0.123597	0.296732	-5.3721		1.19651
O00429	0.198197	10.9608	1.56508	0.128046	0.304362	-5.37367		1.14726
A0A0A0MS15;A0A0B4J1V0;A0A0B4J1V6;A0A0B4J1Y9	0.354198	10.6369	1.5789	0.124839	0.299115	-5.37803		1.27827
P05154	0.245414	11.0187	1.57422	0.125918	0.301096	-5.39651		1.18543
P07996	0.348602	14.4685	1.56994	0.12691	0.302864	-5.40127		1.27333
P50213	0.209125	12.2563	1.54289	0.133334	0.312803	-5.40223		1.15599
P42765	0.266297	10.9009	1.55916	0.129439	0.307066	-5.40572		1.20272
Q9UL25	-0.166658	12.3116	-1.54958	0.131722	0.310116	-5.41176		0.890904
P01876	0.568842	17.1327	1.56829	0.127296	0.303182	-5.41419		1.48333
Q99707	-0.250533	10.2043	-1.54252	0.133424	0.312803	-5.41756		0.840586
P01903	0.375275	11.1786	1.54942	0.13176	0.310116	-5.41852		1.29709
P08519	0.499844	14.0917	1.53722	0.134714	0.315209	-5.42321		1.41406
Q9UHY1	-0.164858	11.3899	-1.52827	0.136915	0.316649	-5.43589		0.892016
P31150	-0.150859	14.5483	-1.53217	0.135951	0.315342	-5.43742		0.900714
P08603	0.453657	16.6985	1.55053	0.131494	0.310116	-5.43928		1.36951
Q7L576	-0.288844	12.2739	-1.55454	0.130535	0.309054	-5.44128		0.818558
P31939	-0.186256	12.8523	-1.53562	0.135105	0.315342	-5.44849		0.878884
Q9UMX5	-0.2402	11.6577	-1.51866	0.139311	0.320334	-5.44975		0.846628
P07437	-0.287465	16.3936	-1.53267	0.135828	0.315342	-5.45378		0.81934
A0M8Q6;P0CF74;P0DOX8;P0DOY3	0.562916	16.4905	1.53162	0.136087	0.315342	-5.45414		1.47725
Q8N9Z0	0.228096	13.0751	1.49617	0.14505	0.327867	-5.46183		1.17129
P31949	-0.192264	16.0728	-1.50653	0.142383	0.324463	-5.46525		0.875231
P42785	0.316921	11.7512	1.53212	0.135963	0.315342	-5.4659		1.24567
Q8TD19	-0.243708	11.0509	-1.52038	0.138878	0.319953	-5.47054		0.844572
P04839	0.248801	11.2143	1.52243	0.138366	0.319389	-5.47162		1.18822
Q8WUP2	-0.587229	13.5302	-1.50622	0.14246	0.324463	-5.47388		0.66562
Q7Z5L7	0.211426	12.4235	1.50326	0.143219	0.325165	-5.48063		1.15783
Q93009	-0.256759	11.6668	-1.5116	0.141092	0.323189	-5.48297		0.836966
P49356	-0.300548	10.589	-1.50637	0.142423	0.324463	-5.48635		0.811944
P04439	0.336271	14.2192	1.49005	0.146642	0.329429	-5.48684		1.26249
Q8NC51	-0.331729	11.2445	-1.51227	0.140922	0.323189	-5.49078		0.794584
P02545	-0.432587	17.0815	-1.5029	0.143312	0.325165	-5.49239		0.740932
P04899;P08754;P63096	0.246356	11.8816	1.49435	0.145521	0.328313	-5.49909		1.18621
Q9NRR5	-0.228768	11.5967	-1.50152	0.143668	0.325357	-5.50129		0.853363
P02462;P29400	0.375123	12.056	1.45955	0.1548	0.343426	-5.52201		1.29695
P04259;P19013;P35908	0.745308	12.6606	1.4893	0.146841	0.329429	-5.52432		1.67633
P04179	0.357778	16.0901	1.4912	0.146342	0.329429	-5.52783		1.28145
P04350;P68371	-0.323991	12.3385	-1.48642	0.147595	0.330501	-5.53114		0.798857
P00390	0.187944	12.8037	1.46565	0.153141	0.34219	-5.53775		1.13914
P14735	0.196882	11.2909	1.45154	0.157	0.346382	-5.54038		1.14622
Q7Z4W1	0.273672	10.6309	1.46474	0.153386	0.34219	-5.55018		1.20888
Q9NQR4	0.189338	12.0932	1.46039	0.15457	0.343426	-5.55104		1.14024
P26440	-0.272319	10.3856	-1.43225	0.162403	0.355035	-5.5594		0.827987
Q9Y262	-0.236166	11.1868	-1.4555	0.155908	0.345245	-5.56143		0.848999
Q93062	-0.421353	11.2143	-1.46339	0.153752	0.342369	-5.56175		0.746724
P30047	0.383496	10.5134	1.43871	0.160578	0.352331	-5.58016		1.3045
P02671	0.662729	15.8236	1.45427	0.156247	0.345357	-5.58425		1.58307
P07108	0.356093	14.0731	1.42894	0.163346	0.355796	-5.5849		1.27996
Q8NBL1	-0.248983	10.7018	-1.42234	0.165235	0.357507	-5.5854		0.84149
P24752	-0.385505	14.001	-1.44128	0.159857	0.351391	-5.59129		0.765511
Q9Y305	-0.227363	11.3057	-1.43664	0.161162	0.352964	-5.59605		0.854195
P00167	-0.216221	9.98384	-1.42382	0.164808	0.357507	-5.59778		0.860817
P02675	0.804335	17.495	1.44366	0.15919	0.350568	-5.59883		1.74634
Q8NBQ5	0.206315	11.1541	1.3823	0.177079	0.372177	-5.59926		1.15374
P30086	-0.269118	14.3589	-1.41668	0.16687	0.35955	-5.60533		0.829827
P02768	0.284562	19.962	1.42203	0.165325	0.357507	-5.608		1.21804
P00491	0.202538	12.5498	1.43028	0.162963	0.35561	-5.6099		1.15072
P21281	0.195853	13.2782	1.42038	0.165799	0.357888	-5.61353		1.1454
P25786	-0.228392	12.3803	-1.42537	0.164365	0.357367	-5.6141		0.853585
Q9UNW1	0.317386	12.6748	1.40049	0.171617	0.365484	-5.61783		1.24607
P02533;Q04695	0.266897	11.7978	1.39899	0.172064	0.365484	-5.61899		1.20322
Q9UKX5	-0.239622	11.7445	-1.40283	0.170926	0.365484	-5.61913		0.846967
Q8WXF1	-0.172662	10.1431	-1.39913	0.172022	0.365484	-5.62332		0.887204
P29218	0.179008	12.303	1.4074	0.16958	0.363429	-5.62815		1.13211
Q92575	-0.176121	11.6178	-1.39379	0.173613	0.367472	-5.6299		0.885079
P31948	-0.158604	13.3462	-1.40147	0.171329	0.365484	-5.63596		0.895891
P05452	0.26143	13.8233	1.39091	0.174476	0.367997	-5.63598		1.19867
P01602	0.319681	11.5281	1.37359	0.17974	0.376449	-5.64219		1.24805
P06753;P67936	-0.538362	13.4536	-1.41112	0.168489	0.362388	-5.64294		0.688552
P01861	1.03344	15.5577	1.40965	0.16892	0.362664	-5.64492		2.0469
Q86VP6	-0.244833	12.9758	-1.39187	0.17419	0.367997	-5.6452		0.843913
P36269	0.352359	13.1663	1.39586	0.172995	0.366811	-5.6586		1.27665
P00748	0.182933	12.3343	1.3402	0.190237	0.392261	-5.66622		1.13519
P26927	0.27739	11.6766	1.38975	0.174825	0.368084	-5.66753		1.212
Q9Y520	0.23095	11.2142	1.36557	0.18222	0.380976	-5.68273		1.17361
Q8N8S7	-0.264596	10.9066	-1.37359	0.179739	0.376449	-5.68274		0.832432
P05388	-0.325292	12.1756	-1.35132	0.186688	0.386942	-5.69017		0.798137
P25787	-0.192156	13.4973	-1.35246	0.186327	0.386942	-5.69081		0.875297
E9PAV3;Q9BZK3	-0.258972	11.2807	-1.35901	0.184266	0.384583	-5.69146		0.835683
P09110	0.302165	10.7718	1.33331	0.192459	0.394129	-5.70067		1.23299
Q9UHD9	-0.31405	9.73981	-1.35593	0.185234	0.385931	-5.70196		0.804381
P25774	0.368894	11.3099	1.34815	0.187696	0.388359	-5.71057		1.29136
P07237	-0.118547	15.0711	-1.33654	0.191414	0.393335	-5.711		0.921115
P05976	-0.364028	12.5827	-1.33818	0.190885	0.392921	-5.71624		0.776992
P40121	0.329901	15.1776	1.35166	0.186583	0.386942	-5.72046		1.25693
Q8TDX7	-0.245567	9.31414	-1.34077	0.190051	0.392261	-5.72662		0.843484
Q9Y4L1	-0.176884	12.5984	-1.32577	0.194917	0.397804	-5.73622		0.884612
Q9UBW8	-0.273792	10.5481	-1.33346	0.192412	0.394129	-5.74101		0.827142
P48637	0.152435	11.2064	1.31356	0.198946	0.404648	-5.74126		1.11144
P03950	-0.328452	10.3192	-1.33047	0.19338	0.395341	-5.74137		0.796391
P27348;P31946;P63104	-0.171464	13.6383	-1.27396	0.212451	0.422684	-5.74973		0.887941
P07741	-0.154342	12.333	-1.32077	0.196559	0.400472	-5.76015		0.898542
O00159	-0.230881	12.7904	-1.26672	0.214994	0.423623	-5.76155		0.852114
P49593	0.211097	10.833	1.30761	0.200933	0.407996	-5.76243		1.15757
P07437;Q13509;Q13885	-0.307288	13.8597	-1.29571	0.20495	0.414047	-5.77495		0.80816
P04908;Q16777;Q6FI13;Q7L7L0;Q93077	-0.310674	15.4844	-1.27357	0.21259	0.422684	-5.78036		0.806265
P22234	-0.212021	10.8384	-1.29585	0.204901	0.414047	-5.78124		0.863327
P23588	-0.193882	11.9976	-1.28317	0.209251	0.420608	-5.78192		0.87425
P08670	-0.288509	20.617	-1.28805	0.207567	0.418628	-5.78272		0.818748
Q96RQ9	0.325078	10.5678	1.2959	0.204884	0.414047	-5.78302		1.25273
Q8IVF2	-0.210578	11.9292	-1.2701	0.213805	0.422684	-5.78766		0.864191
P30044	0.189097	13.7919	1.28	0.210349	0.42157	-5.79025		1.14005
Q96BM9	0.197614	11.9165	1.28327	0.209216	0.420608	-5.80144		1.1468
P04350;Q9BUF5	0.344078	11.739	1.26414	0.215907	0.424723	-5.80405		1.26934
P08195	0.262633	11.8857	1.27229	0.213037	0.422684	-5.80413		1.19967
P12268	-0.237027	10.8813	-1.27006	0.21382	0.422684	-5.80648		0.848492
P35609	-0.52186	13.4043	-1.2765	0.211567	0.422428	-5.80714		0.696473
Q8N3V7	-0.444522	13.6423	-1.27975	0.210433	0.42157	-5.80847		0.734828
P06132	0.267219	11.3224	1.24698	0.222045	0.431506	-5.81044		1.20349
A0A075B6S5;A0A0C4DH67	0.982153	12.0227	1.27793	0.211067	0.422134	-5.81052		1.97541
P07203	0.187937	12.5696	1.25141	0.220448	0.430826	-5.81056		1.13913
Q9BWJ5	-0.261367	10.3996	-1.24645	0.222237	0.431506	-5.81132		0.834297
Q9UM47	-0.161729	10.5708	-1.23456	0.22657	0.43615	-5.81303		0.893953
Q66K74	0.252552	11.0157	1.26908	0.214165	0.422684	-5.81322		1.19131
P30085	-0.130053	13.3317	-1.2501	0.22092	0.431047	-5.81714		0.913798
P17980	-0.184553	12.6718	-1.27144	0.213335	0.422684	-5.81769		0.879922
Q96CV9	0.215324	10.6896	1.23899	0.224951	0.434663	-5.8201		1.16096
P15924	0.186229	10.2979	1.23433	0.226653	0.43615	-5.82039		1.13779
P22352	-0.270787	15.2775	-1.25685	0.2185	0.428076	-5.82469		0.828867
Q9BWD1	-0.14456	12.7013	-1.23949	0.224765	0.434663	-5.82569		0.904655
P12004	-0.262073	10.879	-1.24877	0.221399	0.431278	-5.82727		0.833889
P08253	-0.392619	12.0061	-1.2614	0.216877	0.425933	-5.82765		0.761745
P40763	-0.160603	12.0878	-1.22326	0.230745	0.440882	-5.83637		0.894651
Q96HC4	-0.423225	13.2097	-1.25633	0.218683	0.428076	-5.83641		0.745756
Q9NR28	0.16054	10.961	1.24484	0.22282	0.431938	-5.83792		1.11771
P00558;P07205	-0.175595	14.4967	-1.21415	0.234155	0.444561	-5.84386		0.885402
P49747	0.355224	12.2567	1.23352	0.226951	0.43615	-5.85747		1.27918
P27918	0.459877	14.2065	1.22539	0.229954	0.440073	-5.86188		1.37542
Q96S19	-0.258223	11.371	-1.22991	0.228283	0.437573	-5.86516		0.836117
Q8NEU8	-0.194356	10.0396	-1.23291	0.227177	0.43615	-5.86712		0.873963
P31946;P61981	-0.214155	13.9313	-1.21919	0.232266	0.441674	-5.86797		0.862051
Q9Y3B3	0.179796	11.2318	1.21966	0.232089	0.441674	-5.87048		1.13272
O00160	-0.232329	11.2318	-1.20816	0.236419	0.446734	-5.8725		0.85126
Q99471	0.183	11.4231	1.18592	0.244957	0.45568	-5.87992		1.13524
P25705	-0.30015	14.6036	-1.22047	0.231786	0.441674	-5.88345		0.812168
O00264	-0.315334	12.7579	-1.21227	0.234865	0.445203	-5.88488		0.803665
P30520	0.203615	12.4847	1.18773	0.244252	0.45568	-5.89003		1.15158
P17931	-0.171307	14.1728	-1.19699	0.240677	0.452939	-5.89148		0.888038
Q9Y5K5	-0.184094	9.95875	-1.19559	0.241214	0.452939	-5.89272		0.880201
Q7LG56	0.149494	11.8598	1.18374	0.245806	0.456552	-5.89305		1.10918
Q92841	-0.165709	11.1042	-1.17416	0.249562	0.459961	-5.89324		0.89149
Q6YN16	-0.165878	12.1436	-1.1958	0.241136	0.452939	-5.89499		0.891386
P54646;Q13131	-0.231412	12.6074	-1.20953	0.235897	0.446453	-5.8963		0.851801
Q9UHG3	-0.227736	13.3754	-1.19406	0.241805	0.453323	-5.89665		0.853974
Q8NBK3	0.201471	10.6249	1.19	0.243372	0.454852	-5.89766		1.14987
P05141;P12236	-0.399832	12.4941	-1.18601	0.24492	0.45568	-5.89812		0.757947
P22413	0.370609	11.2752	1.19744	0.240504	0.452939	-5.90037		1.2929
Q96M27	-0.21569	11.1135	-1.1931	0.242176	0.453323	-5.90229		0.861134
P05783	-0.29704	12.7498	-1.17586	0.24889	0.45943	-5.90271		0.813921
Q92888	-0.166961	11.7035	-1.16496	0.25321	0.465953	-5.90795		0.890717
Q9UJW0	-0.158357	11.1385	-1.18231	0.246363	0.456877	-5.91112		0.896045
P01834	0.551328	17.6266	1.17941	0.247497	0.458271	-5.92525		1.46543
P02533;P08779	0.293414	12.0148	1.14217	0.262411	0.477038	-5.92686		1.22554
P24043	0.197624	11.1313	1.15695	0.256416	0.468986	-5.92872		1.14681
P11177	-0.276335	11.1181	-1.17633	0.248707	0.45943	-5.93025		0.825686
Q68CZ2	0.329359	11.698	1.16015	0.25513	0.468065	-5.93418		1.25646
P46952	-0.234902	12.0605	-1.15817	0.255926	0.468806	-5.94225		0.849743
P17948	-0.274296	12.3911	-1.14252	0.26227	0.477038	-5.9454		0.826854
P48047	-0.363875	11.838	-1.164	0.25359	0.465953	-5.94599		0.777074
P05089	-0.206458	10.41	-1.12555	0.269274	0.485272	-5.9495		0.866662
Q9UBT2	-0.127108	10.6124	-1.13688	0.264582	0.479719	-5.94951		0.915665
Q92616	-0.220523	10.6573	-1.11729	0.272733	0.486394	-5.95238		0.858255
Q68DU8	-0.19278	11.1041	-1.13565	0.265087	0.479719	-5.9536		0.874918
Q76M96	0.184643	11.935	1.12532	0.269371	0.485272	-5.9572		1.13654
P04264	0.133611	16.8514	1.11378	0.274213	0.487091	-5.95789		1.09704
P00746	-0.207561	14.8712	-1.15245	0.258232	0.471588	-5.96166		0.866
Q6P2Q9	0.303644	10.6661	1.1364	0.264781	0.479719	-5.9624		1.23426
P16152	0.199435	13.1433	1.11967	0.271732	0.486394	-5.96509		1.14825
Q86UX2	-0.305478	12.6426	-1.14658	0.260613	0.475212	-5.96524		0.809174
Q6UX71	0.17743	13.368	1.12094	0.271199	0.486394	-5.96898		1.13087
Q969X5	0.115345	9.7472	1.08602	0.286115	0.499862	-5.97645		1.08323
P19320	0.342031	10.7911	1.12552	0.269286	0.485272	-5.9847		1.26754
Q92598	0.282842	11.8463	1.11704	0.272836	0.486394	-5.98646		1.21659
P05023;P50993	-0.164182	11.6311	-1.07387	0.291438	0.503418	-5.9873		0.892434
Q8IVL6	-0.341939	10.2081	-1.10671	0.277209	0.488479	-5.98747		0.78898
Q96C23	0.222715	12.5006	1.12097	0.271188	0.486394	-5.9881		1.16693
Q96KP4	0.142423	14.6751	1.10657	0.277267	0.488479	-5.99015		1.10376
Q9NR99	0.24053	11.7702	1.11782	0.27251	0.486394	-5.99142		1.18143
P49411	-0.196641	12.7302	-1.07241	0.29208	0.503418	-5.99304		0.87258
P50416	-0.31909	11.2689	-1.1185	0.272225	0.486394	-5.99331		0.801575
Q6DD88	-0.197186	13.3623	-1.11186	0.275025	0.487091	-5.9956		0.872251
P11217	0.226664	11.6098	1.1113	0.275259	0.487091	-5.99569		1.17013
Q9UKK9	0.338682	11.6608	1.11347	0.274341	0.487091	-6.0015		1.2646
P36542	-0.169116	12.6636	-1.10979	0.275901	0.487507	-6.00252		0.889387
P00751	0.278806	15.1716	1.1127	0.274669	0.487091	-6.00253		1.21319
Q6UWE0	-0.128614	10.2183	-1.08822	0.285157	0.499442	-6.01166		0.91471
Q9UIQ6	-0.146952	10.548	-1.07288	0.291875	0.503418	-6.01483		0.903156
P08237;P17858	0.26072	11.6845	1.07153	0.29247	0.503418	-6.01604		1.19808
P47897	-0.21281	11.3635	-1.09354	0.282855	0.496862	-6.01614		0.862855
Q9BQE3	-0.173705	15.0269	-1.08858	0.285001	0.499442	-6.0165		0.886563
Q8NHP8	0.191305	10.4391	1.07284	0.291893	0.503418	-6.01808		1.1418
Q9Y5Z4	0.14973	12.8968	1.08059	0.288484	0.502332	-6.01937		1.10936
Q6ZVM7	-0.461628	10.9321	-1.09502	0.282217	0.49647	-6.02004		0.726166
P03973	0.315555	12.5377	1.083	0.287429	0.501223	-6.02058		1.24449
Q9BV20	0.231617	9.88061	1.08575	0.286231	0.499862	-6.02246		1.17415
Q9UDR5	-0.362549	10.2037	-1.07388	0.291431	0.503418	-6.02276		0.777789
Q9Y4E8	-0.253482	10.503	-1.05146	0.301435	0.514416	-6.02395		0.838869
P11498	0.149692	11.1193	1.07876	0.289288	0.503	-6.02623		1.10933
P16278	-0.143319	11.1703	-1.06435	0.295655	0.506717	-6.02628		0.905434
P23142	0.115689	14.7155	1.06117	0.297075	0.508422	-6.02894		1.08349
Q99497	-0.19752	13.5047	-1.0655	0.295146	0.506569	-6.03214		0.872048
P28482	0.138708	12.762	1.04775	0.303114	0.515444	-6.03218		1.10092
P31749	-0.191996	9.51673	-1.06706	0.294449	0.506098	-6.03678		0.875394
P48163	0.189335	12.0544	1.07774	0.289735	0.503047	-6.03705		1.14024
O00232	-0.124727	11.2854	-1.00947	0.320819	0.533807	-6.04854		0.917178
O00161	-0.184562	11.0925	-1.0313	0.310636	0.525624	-6.05462		0.879916
Q6ICL3	0.174532	12.0493	1.05802	0.298484	0.510105	-6.05565		1.1286
P49755	0.150058	12.6252	1.0297	0.311376	0.526133	-6.05796		1.10961
P16112	-0.338937	13.4846	-1.04799	0.303009	0.515444	-6.05853		0.790624
P50238	-0.220625	12.0245	-1.01557	0.31795	0.531602	-6.06424		0.858193
P33241	0.310439	11.211	1.03737	0.307847	0.52238	-6.06822		1.24008
P04075	-0.144592	16.2349	-1.04728	0.303329	0.515444	-6.06976		0.904635
O95996	0.316205	12.4255	1.02061	0.315595	0.530172	-6.07291		1.24505
P29992	-0.19999	12.2855	-1.02701	0.312618	0.527377	-6.0756		0.870556
P24557	0.181539	11.2716	1.03153	0.310533	0.525624	-6.08009		1.13409
Q99829	-0.204369	14.2091	-1.01899	0.316351	0.530172	-6.08164		0.867918
P22695	-0.352664	10.5091	-1.01436	0.318518	0.531602	-6.08559		0.783137
Q9UBX1	0.18367	11.3506	0.982714	0.333602	0.546724	-6.08691		1.13577
Q9BRF8	0.237451	11.9546	1.01884	0.316422	0.530172	-6.08734		1.17891
P07942	0.157967	11.817	1.01417	0.318606	0.531602	-6.0877		1.11571
Q96HP4	-0.18567	12.4315	-1.0045	0.323166	0.535707	-6.08825		0.87924
P41240	0.116033	14.1024	0.990331	0.329928	0.542931	-6.08833		1.08375
P04233	0.443174	11.8945	1.02472	0.313681	0.527796	-6.08843		1.35959
Q7RTS7	-0.323973	15.3898	-1.00567	0.322614	0.535707	-6.09325		0.798867
P02452	0.229559	12.5321	1.01304	0.319137	0.531748	-6.09484		1.17248
P31146	0.246981	13.4571	1.02621	0.312993	0.527377	-6.09587		1.18672
Q92552	0.242948	9.76616	0.994882	0.327745	0.540825	-6.10593		1.18341
P49321	0.19856	11.1795	0.975999	0.336864	0.550564	-6.1076		1.14755
P25789	-0.250761	11.8781	-1.00421	0.323302	0.535707	-6.11418		0.840453
P30084	0.152983	12.0118	0.983815	0.333069	0.546599	-6.11469		1.11187
P07602	0.367701	15.3391	0.997111	0.32668	0.540179	-6.11603		1.29029
P30622	0.121207	10.1445	0.963962	0.342766	0.557169	-6.11666		1.08764
Q9NXR7	-0.223806	11.7348	-0.996644	0.326903	0.540179	-6.11731		0.856303
P49368	-0.143575	14.519	-0.989164	0.330489	0.543108	-6.11997		0.905273
P17655	-0.160498	12.8975	-0.992319	0.328973	0.542104	-6.12368		0.894716
P07996;P35442	0.266335	12.3547	0.979585	0.33512	0.548461	-6.128		1.20275
P02649	0.179731	16.5699	0.966984	0.341278	0.555504	-6.12975		1.13267
P16615	-0.140473	10.687	-0.958168	0.345631	0.55987	-6.13501		0.907222
Q8IYS5	0.239194	11.8051	0.91866	0.365596	0.576618	-6.13556		1.18033
Q96EM0	-0.136632	11.3473	-0.957769	0.345829	0.55987	-6.14269		0.90964
Q9Y394	0.1366	11.146	0.95431	0.347548	0.561136	-6.14393		1.09931
P04259	-0.313023	12.8729	-0.971387	0.339118	0.553492	-6.14497		0.804953
P22314	-0.103299	14.7333	-0.950256	0.34957	0.561221	-6.14592		0.930902
Q9Y6G9	-0.197211	10.4416	-0.955805	0.346804	0.560691	-6.14752		0.872235
P06576	-0.204671	15.621	-0.969044	0.340266	0.55461	-6.14947		0.867736
Q96JY6	-0.281261	11.7954	-0.952718	0.348341	0.561221	-6.14953		0.822871
Q8NBX0	-0.121466	11.0293	-0.923578	0.36307	0.576618	-6.15348		0.919253
P08603;Q02985	0.219512	15.0489	0.95216	0.348619	0.561221	-6.15478		1.16434
P23396	-0.16007	11.6055	-0.925816	0.361925	0.575811	-6.15626		0.894982
Q99426	0.117521	11.8488	0.927586	0.36102	0.575136	-6.15854		1.08487
P42025	-0.178539	10.6785	-0.936984	0.356244	0.5698	-6.15955		0.883597
P27144	0.143638	12.7068	0.919228	0.365303	0.576618	-6.16051		1.10469
P15531	-0.244085	14.1477	-0.957973	0.345728	0.55987	-6.16118		0.844351
P21266	-0.174322	11.9479	-0.949509	0.349943	0.561221	-6.16231		0.886184
Q5VW32	-0.148304	11.4411	-0.938343	0.355557	0.569461	-6.16235		0.90231
Q99832	-0.113176	13.109	-0.915797	0.367071	0.576618	-6.16321		0.924551
Q96D15	-0.153158	12.0487	-0.90619	0.372051	0.578854	-6.16402		0.89928
P05106	-0.171914	12.4025	-0.951119	0.349139	0.561221	-6.16437		0.887664
P04844	-0.176431	11.1235	-0.901543	0.374476	0.579615	-6.16874		0.884889
Q9UBB4	0.122492	10.796	0.917294	0.3663	0.576618	-6.16931		1.08861
P02042;P68871;P69891;P69892	-0.354369	16.8839	-0.913597	0.368208	0.576618	-6.16954		0.782212
Q8WUM4	-0.082599	12.5405	-0.903286	0.373565	0.579615	-6.17232		0.944355
P04350;P68371;Q13509	-0.202171	14.4239	-0.900419	0.375064	0.579777	-6.1771		0.869242
Q96DG6	-0.181349	10.9383	-0.901933	0.374272	0.579615	-6.1808		0.881878
Q9UFN0	0.248566	12.0543	0.922235	0.363759	0.576618	-6.18113		1.18803
P04350;P07437;P68371;Q13885;Q9BUF5	-0.221815	15.3273	-0.915344	0.367305	0.576618	-6.18189		0.857486
Q99460	-0.0947744	11.892	-0.872518	0.389851	0.593112	-6.18395		0.936419
Q9Y3D6	-0.213093	11.519	-0.934324	0.357591	0.571193	-6.18443		0.862686
Q86Y82	0.0857124	12.3425	0.872131	0.390059	0.593112	-6.18466		1.06121
P15311	0.131374	11.2175	0.894862	0.37798	0.58278	-6.18701		1.09534
Q8N3D4	-0.146258	10.3977	-0.931125	0.359217	0.573025	-6.18737		0.903591
Q9NYU2	-0.10134	13.0988	-0.915513	0.367218	0.576618	-6.19119		0.932167
P37802;Q9UI15	-0.676865	15.5809	-0.921932	0.363914	0.576618	-6.19168		0.625523
P02747	-0.213303	15.9229	-0.887486	0.381872	0.586886	-6.19192		0.86256
Q9NSE4	0.104446	11.3032	0.904651	0.372853	0.579349	-6.19259		1.07508
Q9BT78	0.175891	11.135	0.910779	0.369667	0.576643	-6.19295		1.12966
Q96HY6	-0.113363	11.0835	-0.910817	0.369648	0.576643	-6.19512		0.924431
P48061	0.201941	12.2272	0.908606	0.370795	0.57765	-6.19685		1.15024
P07951;P67936	-0.279582	16.7397	-0.911223	0.369437	0.576643	-6.19693		0.823829
Q9Y3B8	0.121404	10.7384	0.885456	0.382948	0.586886	-6.19757		1.08779
P50454	-0.39875	14.1392	-0.914738	0.367618	0.576618	-6.20161		0.758515
P17661	0.291905	12.339	0.88523	0.383068	0.586886	-6.2018		1.22426
Q9BT09	0.108995	10.8278	0.87302	0.389582	0.593112	-6.20201		1.07848
Q96CN7	-0.11217	11.7527	-0.870676	0.39084	0.593443	-6.20247		0.925195
P07738	0.30456	11.2714	0.914239	0.367876	0.576618	-6.20275		1.23504
Q96C86	0.116084	10.95	0.885184	0.383093	0.586886	-6.2035		1.08379
A6NHL2;P68366;Q9BQE3	-0.166165	14.3075	-0.866237	0.393231	0.594061	-6.21562		0.891209
Q9UKG1	-0.119663	11.5744	-0.888219	0.381485	0.586886	-6.21828		0.920402
P30153	-0.160116	13.6742	-0.895041	0.377886	0.58278	-6.21844		0.894953
P15586	0.164437	11.2739	0.855026	0.399309	0.601726	-6.22074		1.12073
P49257	-0.194342	11.8051	-0.850348	0.401863	0.604472	-6.22135		0.873972
Q96T51	0.120633	11.3365	0.872004	0.390127	0.593112	-6.22553		1.08721
P25325	-0.0739752	11.2735	-0.794552	0.433111	0.633872	-6.22556		0.950017
Q9NUJ1	0.164093	10.9433	0.860805	0.396168	0.597745	-6.22561		1.12046
Q8WYK1	-0.333439	14.9927	-0.874939	0.388553	0.593112	-6.22629		0.793643
Q7Z2W4	0.192133	10.1872	0.866301	0.393196	0.594061	-6.22719		1.14245
Q8TCS8	0.14262	10.0387	0.866814	0.392919	0.594061	-6.23048		1.10391
P07195	-0.0921009	13.9056	-0.84117	0.406903	0.609841	-6.23233		0.938156
Q92597	0.187326	13.3489	0.879113	0.386322	0.591078	-6.23388		1.13865
P09326	0.199384	10.4287	0.835528	0.410021	0.61324	-6.23615		1.14821
Q9NRW7	-0.15246	10.9561	-0.869203	0.391633	0.593894	-6.23719		0.899715
P43490	0.12799	12.4686	0.827654	0.414397	0.617473	-6.23823		1.09277
Q96FW1	0.102733	11.9022	0.84056	0.407239	0.609841	-6.24008		1.07381
P17813	-0.155324	11.6692	-0.84856	0.402842	0.604768	-6.2417		0.897931
P09486	-0.117724	13.3672	-0.81102	0.423737	0.625169	-6.24363		0.92164
Q96IZ0	-0.199624	11.4404	-0.849841	0.40214	0.604472	-6.25184		0.870777
P50479	-0.186583	11.7016	-0.816571	0.420606	0.622851	-6.25313		0.878684
Q92945	-0.119731	11.8837	-0.801783	0.42898	0.630587	-6.25769		0.920359
Q8IZ07	-0.125439	10.1895	-0.8233	0.41683	0.619556	-6.26801		0.916725
P15151	-0.304706	10.2283	-0.81187	0.423257	0.625169	-6.26815		0.809607
Q6FHJ7	0.236523	11.3876	0.833725	0.411021	0.613969	-6.26973		1.17815
Q7L523	0.161133	10.645	0.826398	0.415098	0.617748	-6.27043		1.11816
Q9UBI1	-0.17159	9.94863	-0.830926	0.412575	0.615523	-6.2705		0.887864
P49023	0.159969	10.5798	0.821095	0.418065	0.619853	-6.2725		1.11726
Q9Y2Z0	0.132198	10.1541	0.801767	0.428989	0.630587	-6.27383		1.09596
Q9BUF5	-0.150929	13.1313	-0.822034	0.417539	0.61984	-6.27452		0.90067
P18085	0.121927	10.9035	0.780618	0.441139	0.64031	-6.2752		1.08819
Q96BM9;Q9NVJ2	0.175931	11.8745	0.807557	0.425698	0.62729	-6.27644		1.12969
P38919	-0.132638	11.7839	-0.799663	0.430189	0.630915	-6.27651		0.912162
P08575	-0.302426	11.5741	-0.81469	0.421666	0.623649	-6.28267		0.810888
Q93052	-0.286374	14.9409	-0.7743	0.444809	0.643576	-6.28313		0.819961
P30566	0.143462	11.8513	0.799529	0.430265	0.630915	-6.28817		1.10455
P47755;P52907	0.150521	10.7959	0.780026	0.441482	0.64031	-6.28883		1.10997
Q8WZA0	0.160541	10.5355	0.791068	0.43511	0.634911	-6.29531		1.11771
Q63HR2;Q68CZ2;Q9HBL0	-0.318204	14.3313	-0.794152	0.43334	0.633872	-6.29578		0.802068
Q8IZ83	0.185149	11.9076	0.787567	0.437124	0.637074	-6.29679		1.13693
P50135	0.133296	10.0111	0.786616	0.437672	0.637098	-6.29791		1.0968
Q8TDZ2	0.113822	10.7422	0.742519	0.463543	0.660498	-6.29939		1.08209
Q9NZK5	0.178213	10.439	0.791887	0.43464	0.634911	-6.2997		1.13148
A0AVT1	0.0916226	11.82	0.734717	0.468213	0.662602	-6.30022		1.06557
Q9BUH6	0.143647	10.9291	0.776057	0.443786	0.642873	-6.30128		1.10469
Q9BRA2	-0.131956	11.0472	-0.767946	0.448518	0.647362	-6.30176		0.912593
Q96IJ6	-0.0792399	10.9455	-0.767273	0.448912	0.647362	-6.30297		0.946556
P08397	0.121703	10.7152	0.713636	0.480964	0.672339	-6.303		1.08802
P24821	0.217772	14.9781	0.784352	0.438979	0.638225	-6.30536		1.16294
Q8IW45	-0.171137	10.4423	-0.76612	0.449587	0.647362	-6.30574		0.888142
Q9UN86	-0.201232	10.0792	-0.766596	0.449308	0.647362	-6.30613		0.869808
P01034	0.117461	12.9499	0.745479	0.46178	0.659932	-6.31088		1.08482
P00367	0.0761116	13.0125	0.742304	0.463672	0.660498	-6.31267		1.05417
O00410	-0.123946	11.6232	-0.75739	0.45472	0.653183	-6.31464		0.917674
P48147	0.0855016	11.6092	0.745302	0.461885	0.659932	-6.31562		1.06106
P17050	0.121619	12.5306	0.68152	0.500766	0.686123	-6.31658		1.08796
Q8NBJ5	0.117411	11.2495	0.758191	0.454248	0.653183	-6.31685		1.08479
P08237	-0.0836712	11.8436	-0.710924	0.482619	0.673866	-6.31723		0.943653
P04899;P08754;P09471;P63096	-0.156506	13.402	-0.756048	0.455512	0.653538	-6.31832		0.897195
Q9UHB6	-0.0804371	10.1801	-0.690127	0.495415	0.682978	-6.31947		0.945771
P00740	0.244335	13.5258	0.741178	0.464344	0.66067	-6.32223		1.18455
Q9UHA4	0.145248	10.0253	0.736641	0.467059	0.662602	-6.32616		1.10592
Q9Y5X3	-0.11281	11.0869	-0.744818	0.462173	0.659932	-6.32697		0.924785
Q9Y224	-0.124526	12.4746	-0.752078	0.45786	0.65612	-6.32979		0.917305
P09104	-0.139319	14.0076	-0.734414	0.468395	0.662602	-6.33148		0.907948
P16435	-0.0748452	11.4404	-0.704461	0.486575	0.676237	-6.3321		0.949444
Q9UNM6	-0.14107	11.2539	-0.714953	0.480161	0.672339	-6.33217		0.906846
P42229;P51692	0.109019	10.7874	0.733372	0.46902	0.662602	-6.33381		1.07849
P41091	-0.119644	11.1723	-0.657539	0.515845	0.695143	-6.33537		0.920414
P06280	0.19697	11.4189	0.7342	0.468523	0.662602	-6.33661		1.14629
Q9NQP4	0.0932528	10.6301	0.694595	0.49265	0.681224	-6.34044		1.06677
Q96F44	-0.1468	13.0619	-0.717364	0.478694	0.671518	-6.34109		0.903252
Q8WVJ2	0.158782	10.914	0.708279	0.484235	0.673931	-6.34209		1.11634
P08754	-0.0964293	12.0968	-0.70864	0.484015	0.673931	-6.34213		0.935345
Q86X76	-0.100667	11.3643	-0.694759	0.492549	0.681224	-6.34309		0.932602
P28838	0.121656	13.8986	0.738973	0.465662	0.661759	-6.34366		1.08798
Q9Y6I3	0.124599	10.1943	0.731288	0.470273	0.663589	-6.34454		1.0902
Q9UHQ9	0.106023	10.1558	0.681221	0.500953	0.686123	-6.34461		1.07626
P07437;P68371;Q13509;Q13885	-0.235873	15.9477	-0.727081	0.472809	0.666382	-6.34706		0.849171
P30041	-0.143272	15.831	-0.713955	0.480769	0.672339	-6.34793		0.905463
Q9UBQ0	0.0927005	12.5276	0.694019	0.493006	0.681224	-6.34873		1.06636
P46108	0.0902977	11.8201	0.658008	0.515548	0.695143	-6.35326		1.06459
P00441	-0.183564	13.5284	-0.717877	0.478382	0.671518	-6.35377		0.880525
Q9UBY9	-0.319857	10.5118	-0.722967	0.475296	0.6691	-6.35396		0.801149
P02538	-0.122992	11.2409	-0.666512	0.510174	0.69067	-6.3544		0.918281
P26038;P35241	-0.344745	11.6882	-0.719365	0.477479	0.671384	-6.35454		0.787447
Q96QK1	-0.0721338	13.0862	-0.676024	0.5042	0.688299	-6.35574		0.95123
Q9NTX5	0.101647	10.1358	0.708087	0.484353	0.673931	-6.35811		1.073
Q99536	0.12346	14.7431	0.698628	0.490161	0.679645	-6.35941		1.08934
P26022	0.117527	11.7593	0.630095	0.533399	0.706616	-6.36125		1.08487
P09497	0.0796485	11.2595	0.635352	0.530012	0.706616	-6.36236		1.05676
P11532	-0.12154	11.0119	-0.670286	0.507799	0.689563	-6.36529		0.919206
P04062	0.151062	11.1522	0.672	0.506723	0.689051	-6.36623		1.11039
Q96GA7	0.164792	10.0824	0.681519	0.500767	0.686123	-6.36679		1.121
Q96CX2	0.0731218	14.8949	0.658693	0.515113	0.695143	-6.36848		1.05199
Q8IWE2	-0.0849819	10.7633	-0.680014	0.501706	0.686123	-6.37011		0.942796
Q92973	-0.124918	10.2889	-0.675305	0.504651	0.688299	-6.37161		0.917056
P36955	0.0716944	16.0057	0.634307	0.530685	0.706616	-6.37269		1.05095
A0A0B4J2D5;P0DPI2	-0.107702	10.8992	-0.674476	0.50517	0.688299	-6.3728		0.928065
P05161	-0.479584	11.0063	-0.698724	0.490102	0.679645	-6.37363		0.717184
P16035	0.120035	12.0195	0.664611	0.511372	0.691449	-6.3745		1.08676
Q969H8	0.172857	10.5082	0.673798	0.505595	0.688299	-6.37522		1.12729
P11717	-0.112558	10.8245	-0.68236	0.500243	0.686123	-6.3753		0.924947
P02745	0.22182	14.0597	0.689062	0.496075	0.683102	-6.3758		1.1662
P38159	0.194905	12.6166	0.680087	0.50166	0.686123	-6.37581		1.14465
P15144	0.212793	12.3782	0.690989	0.494881	0.682978	-6.3798		1.15893
P15374	-0.0990464	10.5935	-0.647536	0.522206	0.69978	-6.37995		0.93365
P45880	-0.338219	10.8262	-0.669569	0.50825	0.689563	-6.38277		0.791017
Q6PCE3	0.120468	10.6291	0.653951	0.518122	0.696644	-6.38331		1.08709
Q9Y240	-0.186596	12.5114	-0.66644	0.51022	0.69067	-6.38466		0.878677
Q9UBC2	0.159297	12.0419	0.643135	0.525019	0.701978	-6.38485		1.11674
Q6ZMJ4	-0.161705	11.7264	-0.630877	0.532895	0.706616	-6.38522		0.893968
P29966	0.0968987	11.5353	0.577765	0.567731	0.736295	-6.38806		1.06947
Q96P70	-0.0820958	9.62217	-0.582817	0.564369	0.735706	-6.39302		0.944684
Q9NUV9	0.1748	10.753	0.619683	0.540141	0.710307	-6.39483		1.12881
P08779	-0.181692	12.2129	-0.644552	0.524113	0.70155	-6.40012		0.881669
P46939	-0.171956	12.0775	-0.636528	0.529256	0.706616	-6.40184		0.887638
Q8NBF2	0.127533	11.8145	0.649866	0.520721	0.69857	-6.40264		1.09242
P02042	0.186142	17.2023	0.654021	0.518077	0.696644	-6.40456		1.13772
Q8N129	-0.0954437	10.4044	-0.620849	0.539384	0.710091	-6.40472		0.935984
P04350;P07437;P68371;Q13509;Q13885;Q9BUF5;Q9H4B7	-0.115691	15.0531	-0.629786	0.533599	0.706616	-6.40705		0.92294
Q6PEY2	-0.368367	15.7297	-0.650701	0.520189	0.69857	-6.40775		0.774659
P16083	-0.159182	10.9616	-0.624576	0.536968	0.708466	-6.40909		0.895533
P27708	-0.153452	10.5805	-0.629481	0.533796	0.706616	-6.41086		0.899097
P17174	-0.0838603	12.5761	-0.621383	0.539038	0.710091	-6.41144		0.94353
P01903;P01906	0.153538	12.9973	0.626363	0.535811	0.707719	-6.41264		1.11229
Q9Y371	-0.0664443	11.9953	-0.554205	0.583544	0.749488	-6.41302		0.954989
Q96S86	0.0902501	12.8643	0.535847	0.596013	0.758371	-6.4143		1.06455
A6NI72;P14598	0.168891	11.5022	0.628239	0.534598	0.706897	-6.41669		1.12419
P43686	-0.122007	11.396	-0.632223	0.532027	0.706616	-6.41918		0.918909
P47755	-0.16172	13.022	-0.586825	0.561709	0.734636	-6.42023		0.893959
Q9Y5P6	0.0741774	10.8411	0.618271	0.54106	0.710734	-6.42066		1.05276
Q92820	0.123906	11.2137	0.630113	0.533387	0.706616	-6.42095		1.08968
O00273	0.0777362	9.90901	0.49378	0.625055	0.777803	-6.42194		1.05536
P00488	-0.115826	15.2578	-0.527994	0.601385	0.759325	-6.42631		0.922854
Q8NBM8	-0.127241	9.67999	-0.587934	0.560974	0.734477	-6.42731		0.915581
O00170	0.0704617	12.046	0.559725	0.57982	0.746908	-6.42753		1.05005
Q99969	-0.121481	11.8819	-0.562998	0.577617	0.745674	-6.4283		0.919244
P08708	-0.118259	10.2855	-0.571481	0.571928	0.739924	-6.4283		0.921299
Q9NQW7	-0.0894944	13.0193	-0.59685	0.555082	0.727559	-6.42929		0.939852
Q9UBR2	-0.17062	14.7401	-0.580761	0.565736	0.736166	-6.42989		0.888461
P17858;Q01813	-0.170126	11.1632	-0.583843	0.563687	0.735706	-6.43117		0.888765
P26639	-0.0946171	11.1956	-0.577521	0.567894	0.736295	-6.43141		0.936521
Q92974	-0.138086	9.65011	-0.579515	0.566565	0.736166	-6.43569		0.908724
Q9Y3Z3	0.115105	13.3269	0.601873	0.551777	0.724019	-6.43637		1.08305
Q8NBJ7	0.0685372	12.7645	0.539097	0.593795	0.758371	-6.43824		1.04865
P50453	-0.0571981	11.3555	-0.537346	0.594989	0.758371	-6.44133		0.961129
Q99983	-0.230994	13.7549	-0.574697	0.569778	0.73794	-6.4433		0.852048
P11279	0.186963	15.6062	0.566964	0.574954	0.743036	-6.44369		1.13837
Q9UBQ7	0.061448	12.2549	0.550997	0.585713	0.751268	-6.4437		1.04351
P49721	0.104377	13.8447	0.5496	0.586659	0.751591	-6.44412		1.07503
P04259;P13647;P35908	-0.13914	14.0952	-0.560148	0.579535	0.746908	-6.44461		0.90806
Q9BUJ2	0.111457	9.4923	0.582901	0.564313	0.735706	-6.44469		1.08032
P06753;P09493	-0.141119	14.001	-0.533134	0.597866	0.758732	-6.44532		0.906816
Q99816	-0.0594406	10.5853	-0.460298	0.648619	0.797517	-6.44685		0.959636
Q9NUM4	0.109367	9.84691	0.556159	0.582224	0.749199	-6.44761		1.07876
P24539	-0.0982823	11.5779	-0.534476	0.596948	0.758371	-6.44844		0.934145
Q8N5S3	0.208922	11.6917	0.579655	0.566472	0.736166	-6.44864		1.15582
P00352	0.0734545	13.9552	0.5163	0.609427	0.764083	-6.44905		1.05223
Q9BS26	-0.0459667	13.7558	-0.493736	0.625086	0.777803	-6.44936		0.968641
P04275	-0.166595	12.6459	-0.525735	0.602935	0.759325	-6.44978		0.890943
P23526	0.0671518	13.3496	0.536182	0.595784	0.758371	-6.45135		1.04765
Q9BUT1	-0.103055	13.5007	-0.520018	0.606865	0.76288	-6.45205		0.931059
Q9UHY7	-0.0699782	11.3232	-0.535111	0.596515	0.758371	-6.45475		0.952652
Q6XQN6	0.0962155	11.5514	0.527072	0.602017	0.759325	-6.45656		1.06897
P07910	-0.115619	13.1929	-0.553974	0.5837	0.749488	-6.45991		0.922987
Q9NRV9	-0.127224	12.1474	-0.545512	0.589432	0.753617	-6.46068		0.915592
P46459	-0.112848	12.4043	-0.525259	0.603261	0.759325	-6.46182		0.924761
Q9NTJ5	-0.0735309	10.8464	-0.511841	0.612507	0.766754	-6.4645		0.950309
Q9Y2Q3	-0.04129	11.9574	-0.35794	0.722893	0.843257	-6.46475		0.971786
Q99747	0.0727049	9.99352	0.525052	0.603403	0.759325	-6.46514		1.05169
P12111	-0.142533	16.9576	-0.548773	0.58722	0.751591	-6.46538		0.905927
Q6YHK3	-0.0653311	13.1069	-0.491374	0.626735	0.778868	-6.46561		0.955726
P30740	-0.0972597	13.9117	-0.508357	0.614918	0.768472	-6.46932		0.934807
Q9BVK6	0.0751661	11.7167	0.529519	0.60034	0.759325	-6.46971		1.05348
P41250	-0.0712896	13.2655	-0.530907	0.599389	0.759325	-6.47439		0.951787
P05091	-0.0587877	14.2627	-0.426751	0.672606	0.812477	-6.47471		0.960071
P00918	0.0976293	14.5924	0.455984	0.651683	0.798626	-6.47472		1.07001
Q9Y266	0.0780106	12.5749	0.516444	0.609328	0.764083	-6.47495		1.05556
Q92734	0.103858	11.3414	0.52603	0.602732	0.759325	-6.47592		1.07464
Q92882	0.0437351	12.7137	0.352327	0.727054	0.844003	-6.47772		1.03078
P12110	0.0804634	14.6033	0.434397	0.667106	0.809459	-6.47981		1.05736
P40926	-0.0750401	14.2078	-0.480066	0.63466	0.785457	-6.47998		0.949316
P18065	0.130798	11.8145	0.515852	0.609736	0.764083	-6.48302		1.0949
P30038	-0.0447664	11.0215	-0.424642	0.674125	0.812477	-6.48335		0.969447
P07900;P08238;Q58FF8	-0.0682171	11.4443	-0.364448	0.718078	0.841229	-6.48434		0.953816
Q7Z304	0.0952549	12.2509	0.482382	0.633033	0.784254	-6.48461		1.06825
P49588	-0.0407199	12.4317	-0.382218	0.704992	0.831765	-6.48467		0.97217
P00325	-0.129943	15.8681	-0.473295	0.639426	0.78729	-6.48502		0.913867
P32119	-0.109038	15.9983	-0.458027	0.650231	0.798132	-6.48557		0.927206
P18669	0.0391574	13.233	0.339184	0.736832	0.85123	-6.48622		1.02751
P42226	0.0609601	10.8894	0.416595	0.679938	0.816199	-6.48661		1.04316
P41236;Q6NXS1	0.0757736	10.7556	0.476687	0.637036	0.786239	-6.48701		1.05393
P04439;P10321	0.103611	10.9713	0.508004	0.615163	0.768472	-6.48756		1.07446
Q9Y625	-0.120972	13.4715	-0.483423	0.632303	0.784254	-6.48779		0.919568
P11277	-0.111899	11.9032	-0.496558	0.623117	0.777599	-6.48838		0.925369
Q6PCB0	-0.0869566	11.3839	-0.453371	0.653542	0.799737	-6.48937		0.941507
P05787	-0.132551	13.0711	-0.482676	0.632827	0.784254	-6.49035		0.912217
P02533	-0.0691124	12.3924	-0.403332	0.689562	0.82527	-6.49108		0.953224
Q92688	-0.0394118	10.9813	-0.35273	0.726755	0.844003	-6.49117		0.973052
P48739	0.0491507	11.9575	0.435237	0.666503	0.809459	-6.49139		1.03466
O00148;Q13838	0.0768038	14.3304	0.434832	0.666794	0.809459	-6.49149		1.05468
P30273	0.102397	11.5256	0.493531	0.625229	0.777803	-6.49261		1.07356
P17612	-0.230403	12.2015	-0.478796	0.635553	0.78575	-6.49323		0.852397
P08174	0.101771	11.3999	0.459671	0.649064	0.797517	-6.49339		1.07309
P40925	-0.0651199	13.6672	-0.476369	0.63726	0.786239	-6.49389		0.955866
Q9Y2G5	-0.0871214	10.3034	-0.451424	0.654929	0.800617	-6.494		0.941399
P04350;P07437;P68371;Q13509;Q13885;Q9BUF5	0.0936966	13.1091	0.436022	0.66594	0.809459	-6.49402		1.0671
P06733;P09104;P13929	0.0640245	14.067	0.393607	0.696653	0.827146	-6.495		1.04538
Q9NRX4	0.0547154	12.5048	0.445601	0.659082	0.804053	-6.49617		1.03865
P05387	0.0932578	13.0379	0.359791	0.721522	0.843257	-6.49685		1.06678
Q9NY15	0.108349	12.5506	0.474164	0.638814	0.78729	-6.49945		1.07799
Q9UIJ7	-0.0448792	13.5244	-0.425567	0.673459	0.812477	-6.50494		0.969371
Q9Y6H1	0.0702585	10.8383	0.400536	0.691598	0.825672	-6.50539		1.0499
Q9UNZ2	0.0474788	12.031	0.346649	0.731273	0.847258	-6.50605		1.03346
P27361;P28482	-0.105186	12.5385	-0.455585	0.651967	0.798626	-6.50805		0.929685
P50552	-0.092111	12.74	-0.411899	0.68334	0.819461	-6.50853		0.938149
Q9NR45	-0.0432016	12.466	-0.369264	0.714523	0.839214	-6.50964		0.970499
Q8TAT6	0.0999163	12.2596	0.431875	0.668919	0.809459	-6.50979		1.07171
Q96IU4	0.0966758	13.9519	0.425541	0.673477	0.812477	-6.51119		1.06931
P08648	-0.08053	13.4156	-0.397155	0.694063	0.825672	-6.51194		0.94571
P06865	-0.0704762	11.9324	-0.399157	0.692603	0.825672	-6.51246		0.952324
Q9Y2D5	0.0845322	11.6059	0.44648	0.658455	0.804053	-6.51251		1.06034
Q6P179	0.109596	10.9095	0.419247	0.67802	0.814713	-6.51297		1.07893
P18085;P84085	0.078626	12.4778	0.420692	0.676977	0.814275	-6.51336		1.05601
Q92626	0.0734251	11.5344	0.432269	0.668635	0.809459	-6.51353		1.05221
P12109	-0.0771506	15.4968	-0.397061	0.694131	0.825672	-6.51425		0.947928
P24592	0.092252	12.3991	0.441515	0.662004	0.806796	-6.51499		1.06603
Q96TA1	0.0583663	12.5612	0.420941	0.676797	0.814275	-6.51617		1.04129
P04259;P13647	0.0875515	14.0019	0.396251	0.694722	0.825672	-6.51683		1.06257
Q8WWI1	-0.0544276	10.3714	-0.313613	0.755984	0.860513	-6.51722		0.962976
P04259;P04264	0.176069	13.0612	0.410671	0.68423	0.819708	-6.51975		1.1298
P15153	-0.112463	12.1484	-0.402055	0.690492	0.825558	-6.52122		0.925007
P49753;Q86TX2	0.0495356	10.1202	0.359095	0.722037	0.843257	-6.52251		1.03493
Q63HM2	0.0835142	13.1631	0.354706	0.725289	0.843589	-6.52455		1.0596
P02743	-0.128494	18.2155	-0.432877	0.668198	0.809459	-6.52466		0.914786
P31040	0.0561382	13.1353	0.381657	0.705404	0.831765	-6.52497		1.03968
Q9Y2E5	0.0580134	10.5795	0.34793	0.730321	0.846974	-6.52675		1.04103
Q9UHL4	-0.0817724	11.5114	-0.383895	0.703762	0.831765	-6.52719		0.944896
P43405	-0.0873289	10.3735	-0.39893	0.692769	0.825672	-6.5273		0.941264
P28070	-0.0827099	11.5663	-0.388783	0.70018	0.830511	-6.52879		0.944282
P04264;P35908	-0.0342083	17.5993	-0.264422	0.793262	0.88527	-6.53005		0.976568
Q9Y285	-0.0582474	10.7093	-0.373053	0.71173	0.836755	-6.53113		0.96043
P26885	-0.03796	11.8341	-0.314578	0.755258	0.860513	-6.53154		0.974031
P30533	-0.0735923	10.2854	-0.366226	0.716765	0.841022	-6.53343		0.950269
P40227;Q92526	-0.0529039	11.2654	-0.314941	0.754985	0.860513	-6.53378		0.963994
Q9Y376	-0.0751053	12.4862	-0.381883	0.705238	0.831765	-6.53595		0.949273
P29401	-0.0571396	15.6413	-0.379185	0.70722	0.833087	-6.53868		0.961168
P09417	-0.0593745	11.756	-0.37694	0.708869	0.83421	-6.53894		0.95968
Q96C19;Q9BUP0	-0.0626921	13.0173	-0.305928	0.761771	0.864206	-6.53939		0.957476
Q92900	-0.0374404	11.6623	-0.245766	0.807536	0.894111	-6.54012		0.974382
P08603;Q03591	0.0634276	15.0319	0.356698	0.723813	0.84329	-6.54031		1.04495
Q9BR76	-0.0363953	11.867	-0.319034	0.75191	0.860352	-6.54033		0.975088
P50583	0.0877778	10.722	0.356003	0.724328	0.84329	-6.54057		1.06273
P23528	-0.0718665	15.6375	-0.263087	0.794281	0.88527	-6.54074		0.951406
P32455;P32456	-0.0820022	11.9801	-0.384474	0.703337	0.831765	-6.54107		0.944746
P00505	0.0450822	11.9278	0.364087	0.718345	0.841229	-6.54147		1.03174
P31937	0.0467917	12.2161	0.340275	0.736019	0.851111	-6.54171		1.03297
P27694	-0.0986374	10.5088	-0.38299	0.704426	0.831765	-6.54171		0.933915
P36957	-0.0668694	12.514	-0.266988	0.791304	0.88527	-6.54278		0.954707
Q99798	-0.0326257	13.2758	-0.328739	0.744635	0.856116	-6.54337		0.977639
P11940	-0.0342583	10.7371	-0.275279	0.784987	0.883849	-6.54395		0.976534
P23786	-0.00980194	11.2292	-0.0908537	0.928212	0.97033	-6.5442		0.993229
P49189	0.0586295	11.8236	0.357999	0.722849	0.843257	-6.5442		1.04148
P30046	-0.051958	13.9432	-0.237563	0.813834	0.898592	-6.5447		0.964626
P02545;P20700;Q03252	0.0375345	10.551	0.25426	0.801028	0.890196	-6.54492		1.02636
Q9NR31	0.046929	11.5306	0.281707	0.780101	0.881662	-6.54648		1.03306
Q9UJZ1	-0.123859	11.8357	-0.332139	0.742093	0.854834	-6.54664		0.91773
P08134;P61586	-0.11187	13.9274	-0.309658	0.75896	0.861834	-6.54735		0.925388
Q8N6Y2	-0.0572158	10.4678	-0.279942	0.781442	0.882345	-6.5474		0.961117
Q99436	-0.0649681	12.129	-0.33669	0.738693	0.852557	-6.54865		0.955966
O00116	0.0483024	11.4617	0.32054	0.750779	0.860352	-6.54949		1.03405
Q8IVM0	-0.0502408	10.1358	-0.334695	0.740183	0.853454	-6.55005		0.965775
P02730	0.110116	13.082	0.267908	0.790602	0.88527	-6.55028		1.07932
P11908;P60891	0.0517633	11.8049	0.317133	0.753337	0.860513	-6.55065		1.03653
P05026	0.0406092	12.3868	0.213331	0.832511	0.910866	-6.55163		1.02855
Q63ZY3	-0.108053	11.9704	-0.327137	0.745835	0.856673	-6.55278		0.92784
P42704	-0.0449739	11.7375	-0.261739	0.79531	0.88527	-6.55408		0.969307
P30048	-0.0453974	14.21	-0.322468	0.749333	0.859867	-6.555		0.969023
P30519	-0.0644879	10.9509	-0.303666	0.763477	0.865322	-6.55579		0.956285
P08493	0.094083	14.9856	0.238896	0.81281	0.898592	-6.55594		1.06739
P18621	-0.0660104	10.2737	-0.272113	0.787398	0.884899	-6.55615		0.955276
Q9Y230	-0.0187148	11.3231	-0.163017	0.871598	0.93564	-6.55661		0.987112
Q92947	-0.055434	10.4731	-0.311399	0.75765	0.861161	-6.55772		0.962305
P49327	0.00464339	11.0842	0.0248681	0.980325	0.988654	-6.55877		1.00322
P27348	0.033816	12.9171	0.174332	0.862775	0.931175	-6.55891		1.02372
P15559	0.12584	11.9002	0.330949	0.742982	0.855036	-6.55903		1.09114
P27658	-0.070689	12.6638	-0.296247	0.769081	0.87085	-6.55907		0.952183
Q9UHW9;Q9UP95	-0.107751	9.21158	-0.341424	0.735163	0.850942	-6.55925		0.928034
Q99729	-0.0594442	12.6473	-0.283079	0.779059	0.881315	-6.55946		0.959634
P04908;Q7L7L0;Q93077	-0.07385	10.4627	-0.313112	0.756361	0.860513	-6.55948		0.950099
Q7L5N7	0.0392554	10.3338	0.27723	0.783504	0.883008	-6.55956		1.02758
P02751	-0.0856054	17.3716	-0.269594	0.789317	0.88527	-6.56103		0.942389
P27797	-0.0283131	15.0075	-0.269466	0.789414	0.88527	-6.5623		0.980566
O00231	-0.0412072	12.0097	-0.31912	0.751845	0.860352	-6.56245		0.971841
P17858	-0.0272963	12.9727	-0.218621	0.828425	0.90863	-6.56251		0.981258
Q7Z7G0	0.0353999	14.0968	0.163992	0.870836	0.93564	-6.56267		1.02484
O96007	0.0081286	10.6414	0.0673765	0.946729	0.97692	-6.56283		1.00565
P14923	-0.0562767	11.7633	-0.264853	0.792933	0.88527	-6.56303		0.961743
Q99598	-0.0223315	11.4624	-0.140258	0.889393	0.94575	-6.56439		0.98464
Q9Y5L0	0.0483913	9.91943	0.313115	0.756358	0.860513	-6.56459		1.03411
P31942	-0.00886536	11.6652	-0.0500802	0.96039	0.978666	-6.56464		0.993874
Q8WVM8	0.0297631	10.9353	0.233112	0.817256	0.899057	-6.56485		1.02084
P16298;Q08209	0.0562615	10.3626	0.262088	0.795043	0.88527	-6.56782		1.03977
P49748	0.0203245	12.8409	0.182938	0.856077	0.925614	-6.56845		1.01419
Q8IY67	0.071967	9.96397	0.272518	0.78709	0.884899	-6.57032		1.05115
P20936	-0.0227295	9.87874	-0.136937	0.891995	0.94575	-6.57042		0.984369
P07204	0.0327636	10.237	0.199887	0.842917	0.918013	-6.57047		1.02297
P42771	0.0341078	9.86253	0.18986	0.850697	0.923129	-6.57172		1.02392
Q8NFQ8	0.0330375	11.3677	0.221299	0.826358	0.908235	-6.57217		1.02316
P38646	-0.0272522	13.9587	-0.261024	0.795856	0.88527	-6.57243		0.981288
Q8N163	-0.0119697	11.5508	-0.0601031	0.952472	0.97692	-6.57274		0.991738
P38117	0.0413839	11.7409	0.235255	0.815608	0.898921	-6.57345		1.0291
P18124	-0.0604367	10.917	-0.278426	0.782594	0.882814	-6.57436		0.958974
P05413	-0.0259989	11.9247	-0.14711	0.884029	0.943069	-6.57525		0.98214
P06748	-0.0561683	12.7509	-0.262182	0.794972	0.88527	-6.5754		0.961815
Q9NZ08	0.0397865	12.7989	0.217886	0.828992	0.90863	-6.57629		1.02796
Q6WCQ1	0.0463793	11.0282	0.219641	0.827638	0.90863	-6.57679		1.03267
P31946	-0.0464658	13.6789	-0.247225	0.806417	0.893698	-6.57707		0.968305
P29144	0.00335124	10.7241	0.0261138	0.979339	0.988654	-6.5771		1.00233
P28065	0.0403576	10.7418	0.201904	0.841353	0.917144	-6.57735		1.02837
Q96G03	-0.0179094	12.774	-0.137669	0.891421	0.94575	-6.57803		0.987663
P16930	-0.024565	13.4765	-0.163081	0.871548	0.93564	-6.57863		0.983117
P39900	0.0538173	10.6651	0.210315	0.834843	0.912473	-6.57865		1.03801
P22570	-0.0194445	9.61288	-0.098317	0.922334	0.966716	-6.5787		0.986613
P35998	-0.016079	11.6284	-0.13877	0.890558	0.94575	-6.57876		0.988917
P48735	-0.0231269	13.5981	-0.0955651	0.924501	0.96814	-6.57878		0.984097
P11940;Q13310	0.0557864	12.6373	0.194889	0.846793	0.920561	-6.57912		1.03943
P09488;P28161	-0.0738462	12.2731	-0.235224	0.815632	0.898921	-6.57922		0.950102
P04899;P63096	0.0268907	12.2777	0.0744442	0.941151	0.97656	-6.5794		1.01881
P49720	-0.0427577	11.5239	-0.206064	0.838132	0.914465	-6.57963		0.970797
Q9BQS8	-0.0097196	10.1905	-0.0595348	0.952921	0.97692	-6.57998		0.993286
P32455	0.0185765	13.12	0.121873	0.903811	0.952094	-6.58034		1.01296
P02746	0.0758764	16.2774	0.251783	0.802925	0.891477	-6.58288		1.054
Q96AP7	-0.0122289	10.7144	-0.0626079	0.950494	0.97692	-6.58324		0.991559
P22102	0.00313866	11.613	0.0230767	0.981742	0.988654	-6.5837		1.00218
Q9UH65	-0.0170814	10.846	-0.123638	0.902426	0.951678	-6.58447		0.98823
P47756	0.00529996	14.1172	0.0541058	0.957209	0.978407	-6.58465		1.00368
P02776;P10720	-0.0861536	10.7058	-0.250713	0.803744	0.891561	-6.58469		0.942031
Q6PGP7	0.00142556	10.9845	0.00962084	0.992387	0.994352	-6.58523		1.00099
P50502;Q8NFI4	-0.110188	12.8997	-0.233369	0.817059	0.899057	-6.58627		0.926467
P25398	-0.0108367	12.5581	-0.0531187	0.957989	0.978407	-6.58675		0.992517
Q99714	-0.0201632	12.2098	-0.154679	0.87811	0.940103	-6.58713		0.986121
P39059	0.0474118	13.7579	0.187566	0.852479	0.923765	-6.5875		1.03341
Q8NCW5	0.0412441	11.4036	0.209407	0.835545	0.912473	-6.58756		1.029
P28072	-0.0148604	10.9126	-0.125762	0.900759	0.950757	-6.58773		0.989752
P30043	0.006583	14.0628	0.04384	0.965322	0.979432	-6.5885		1.00457
P36405	0.00413836	10.886	0.0337714	0.973283	0.984791	-6.58927		1.00287
P27348;P31946;P61981;P62258;P63104;Q04917	-0.00367347	14.7205	-0.00923609	0.992692	0.994352	-6.58992		0.997457
P31151	0.0327195	10.5184	0.152471	0.879836	0.94111	-6.59023		1.02294
Q8IVN3	0.0834885	11.3085	0.163723	0.871047	0.93564	-6.59024		1.05958
P46782	-0.0176755	11.7231	-0.0631483	0.950067	0.97692	-6.59044		0.987823
P02042;P68871	-0.00123606	18.9559	-0.00566762	0.995515	0.996347	-6.59152		0.999144
O00299	0.0294411	14.5009	0.19307	0.848205	0.921259	-6.59177		1.02062
Q8WWA0	0.0388656	12.3042	0.119812	0.90543	0.952094	-6.59233		1.02731
P06744	0.039114	16.3815	0.238201	0.813343	0.898592	-6.5924		1.02748
Q9Y2B0	-0.0135629	11.8033	-0.0757081	0.940154	0.97656	-6.5924		0.990643
P49773	-0.0141494	11.7365	-0.0817229	0.935409	0.973529	-6.59307		0.99024
P15121	0.0529693	14.9902	0.187121	0.852825	0.923765	-6.59373		1.0374
Q8IWU6	0.023373	10.5955	0.111037	0.912326	0.957064	-6.59406		1.01633
Q9Y5M8	0.0241147	9.61815	0.140915	0.888878	0.94575	-6.5945		1.01686
P40261	-0.0454647	12.7021	-0.133158	0.894957	0.947136	-6.59495		0.968978
P15153;P63000	0.0605988	12.3258	0.213277	0.832553	0.910866	-6.59504		1.0429
Q8WW12	0.0030958	12.1619	0.0242708	0.980797	0.988654	-6.59515		1.00215
P16070	0.0249664	13.7077	0.149257	0.882349	0.942956	-6.59526		1.01746
P32456	0.00376857	11.2414	0.0186594	0.985236	0.991027	-6.59537		1.00262
P08572	-0.00331241	13.9921	-0.0170079	0.986543	0.991509	-6.59545		0.997707
Q9UL46	0.0188094	14.3119	0.133191	0.894931	0.947136	-6.59546		1.01312
P30040	-0.0344471	12.8577	-0.128609	0.898525	0.949235	-6.59604		0.976406
Q9Y3F4	-0.0196476	11.8384	-0.136843	0.892068	0.94575	-6.59624		0.986474
Q9NQG5	0.0100264	10.4857	0.0625119	0.95057	0.97692	-6.59659		1.00697
Q9UMS6	-0.0446773	11.5329	-0.14349	0.886862	0.94525	-6.59666		0.969507
Q5VYK3	0.015329	10.6063	0.121061	0.90445	0.952094	-6.59677		1.01068
P49354	0.0018458	10.9987	0.0127033	0.989949	0.994098	-6.5976		1.00128
P35908	-0.0112552	15.5753	-0.0726522	0.942565	0.97656	-6.59809		0.992229
Q9UBF2;Q9Y678	-0.0525965	11.0345	-0.131828	0.896	0.947403	-6.59862		0.964199
Q8N1N4	0.0113431	13.1628	0.067679	0.94649	0.97692	-6.59866		1.00789
P00915	-0.0124571	15.5372	-0.0424503	0.966421	0.979432	-6.59898		0.991403
Q9BRR9	0.0269233	11.2575	0.119088	0.905999	0.952094	-6.59905		1.01884
P28062	0.0200984	10.7135	0.0815169	0.935572	0.973529	-6.59919		1.01403
P05067	-0.0380005	12.2309	-0.19871	0.843829	0.918172	-6.59937		0.974004
Q96CN4	0.0212075	10.2652	0.0879474	0.930503	0.97103	-6.59946		1.01481
Q9UJU6	0.0130636	13.2207	0.0926839	0.92677	0.969669	-6.59998		1.0091
Q9Y678	-0.010922	11.9196	-0.0588705	0.953445	0.97692	-6.60089		0.992458
P02533;P08779;P13645	0.0377294	14.5476	0.113582	0.910325	0.955802	-6.60128		1.0265
P04350;P07437;P68371;Q13509	0.0105537	13.6544	0.0425505	0.966342	0.979432	-6.60176		1.00734
P50452;P50453	0.0782306	12.994	0.147297	0.883883	0.943069	-6.60232		1.05572
A5A3E0;P0CG38;P0CG39;Q9BYX7	0.0114382	14.3975	0.0424367	0.966432	0.979432	-6.60251		1.00796
P01876;P0DOX2	-0.020609	16.0101	-0.0737794	0.941675	0.97656	-6.60325		0.985816
Q93091	-0.00606404	11.1459	-0.0285708	0.977396	0.988118	-6.60326		0.995806
Q9ULA0	-0.0272006	10.839	-0.166384	0.86897	0.93564	-6.60336		0.981323
P31751	0.00863828	10.1508	0.0496961	0.960694	0.978666	-6.60342		1.00601
Q9UBS4	-0.0119029	10.8199	-0.064883	0.948697	0.97692	-6.60358		0.991783
P48960	-0.063612	11.9485	-0.185144	0.854361	0.924593	-6.60378		0.956865
Q9Y2V2	0.0355685	12.9567	0.180934	0.857635	0.926462	-6.60423		1.02496
P45974	-0.000592918	14.2888	-0.00441328	0.996508	0.996508	-6.60556		0.999589
P23381	-0.0295308	13.9593	-0.171708	0.864819	0.932541	-6.60606		0.979739
P08559	0.0122956	10.7057	0.0719253	0.943138	0.97656	-6.60617		1.00856
O00244	-0.0154376	11.6849	-0.0506114	0.95997	0.978666	-6.60619		0.989356
P27105	0.0134759	12.0647	0.0580581	0.954087	0.97692	-6.60634		1.00938
P14866	-0.00627869	12.0758	-0.0415041	0.967169	0.979432	-6.60664		0.995657
P11940;Q9H361	0.00186391	12.4178	0.0102154	0.991917	0.994352	-6.60689		1.00129
P42566	-0.023491	10.073	-0.0891879	0.929525	0.970855	-6.60714		0.983849
P07954	0.00739852	12.0696	0.0585952	0.953663	0.97692	-6.60788		1.00514
P28066	0.0396764	13.5597	0.160711	0.873398	0.936733	-6.60807		1.02788
P31943;P55795	0.0118093	11.774	0.0445607	0.964753	0.979432	-6.60834		1.00822
P42224	-0.0466457	12.719	-0.15865	0.875007	0.937619	-6.6084		0.968185
Q92743	0.00451267	14.6048	0.0226845	0.982052	0.988654	-6.60858		1.00313
P16949	-0.0104	12.0697	-0.0431502	0.965868	0.979432	-6.60932		0.992817
P06737	-0.00991928	12.5223	-0.0643495	0.949118	0.97692	-6.61008		0.993148
P35914	0.0147593	11.3467	0.0807859	0.936148	0.973529	-6.61507		1.01028
P49903	0.0236725	9.74922	0.0810343	0.935952	0.973529	-6.61522		1.01654
Q9UGT4	0.0167987	11.5021	0.0624707	0.950602	0.97692	-6.61907		1.01171
P04350;P07437;P68371;Q13885	0.0173568	13.4381	0.056977	0.954941	0.976959	-6.61953		1.0121
